# Supplementary material for: Synthesis and Characterization of New Series of 1,3-5-Triazine Hydrazone Derivatives with Promising Antiproliferative Activity
Source: MDPI journal article supplement (doi:10.3390/molecules25112708), 2020-06-11
Supplement: s1 [file s1]

Article

# Synthesis and Characterization of New Series of 1,3-5-Triazine Hydrazone Derivatives with Promising Antiproliferative Activity

Hessa H. Al Rasheed <sup>1,\*</sup>, Azizah M. Malebari <sup>2</sup> and Kholood A. Dahlous <sup>1</sup>, Ayman El-Faham <sup>1,3,\*</sup>

<sup>1</sup> Department of Chemistry, College of Science, King Saud University P.O. Box 2455, Riyadh 11451, Saudi Arabia; kdahloos@KSU.EDU.SA

<sup>2</sup> Department of Pharmaceutical Chemistry, College of Pharmacy, King Abdulaziz University, P.O.Box : 80260, Jeddah 21589, Saudi Arabia; amelibary@kau.edu.sa

<sup>3</sup> Chemistry Department, Faculty of Science, Alexandria University, P.O. Box 426, Ibrahimia, Alexandria 12321, Egypt

\* Correspondence: halbahli@ksu.edu.sa (H.H.A.R.); aelfaham@ksu.edu.sa or aymanel\_faham@hotmail.com (A.E.-F.); Tel.: +96-61-1467-3195 (A.E.-F.)

## Table of Content

<sup>1</sup>H-NMR and <sup>13</sup>C-NMR for compound **7a**

<sup>1</sup>H-NMR and <sup>13</sup>C-NMR for compound **7b**

<sup>1</sup>H-NMR and <sup>13</sup>C-NMR for compound **7c**

<sup>1</sup>H-NMR and <sup>13</sup>C-NMR for compound **7d**

<sup>1</sup>H-NMR and <sup>13</sup>C-NMR for compound **7e**

<sup>1</sup>H-NMR and <sup>13</sup>C-NMR for compound **7f**

<sup>1</sup>H-NMR and <sup>13</sup>C-NMR for compound **8a**

<sup>1</sup>H-NMR and <sup>13</sup>C-NMR for compound **8b**

<sup>1</sup>H-NMR and <sup>13</sup>C-NMR for compound **8c**

<sup>1</sup>H-NMR and <sup>13</sup>C-NMR for compound **8d**

<sup>1</sup>H-NMR and <sup>13</sup>C-NMR for compound **8e**

<sup>1</sup>H-NMR and <sup>13</sup>C-NMR for compound **9a**

<sup>1</sup>H-NMR and <sup>13</sup>C-NMR for compound **9b**

<sup>1</sup>H-NMR and <sup>13</sup>C-NMR for compound **9c**

<sup>1</sup>H-NMR and <sup>13</sup>C-NMR for compound **9d**

<sup>1</sup>H-NMR and <sup>13</sup>C-NMR for compound **9e**

<sup>1</sup>H-NMR and <sup>13</sup>C-NMR for compound **9f**

<sup>1</sup>H-NMR and <sup>13</sup>C-NMR for compound **10**

<sup>1</sup>H-NMR and <sup>13</sup>C-NMR for compound **11**

<sup>1</sup>H-NMR and <sup>13</sup>C-NMR for compound **12**

Figure S1

Figure S2

Figure S3

Figure S4

Figure S5

Figure S6

Figure S7

Figure S8

Figure S9

Figure S10

Figure S11

Figure S12

Figure S13

Figure S14

Figure S15

Figure S16

Figure S17

Figure S18

Figure S19

Figure S20

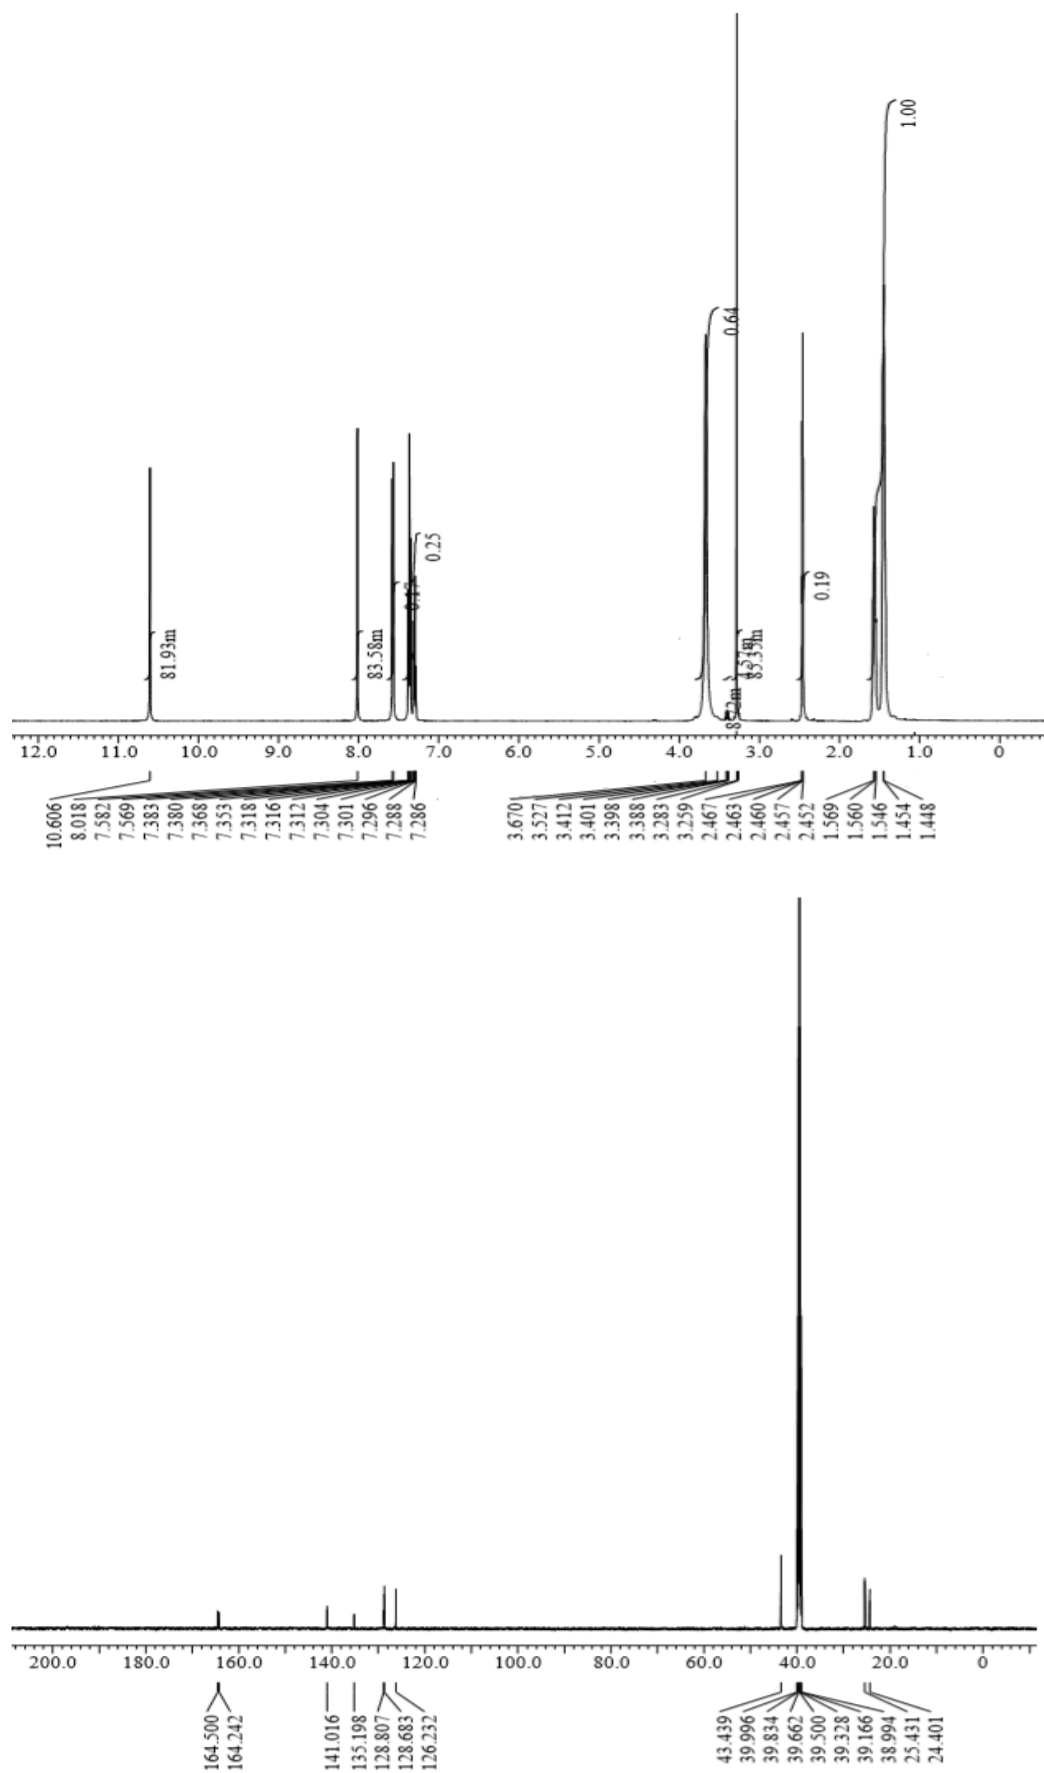

Figure S1.  $^1\text{H-NMR}$  and  $^{13}\text{C-NMR}$  for compound 7a.

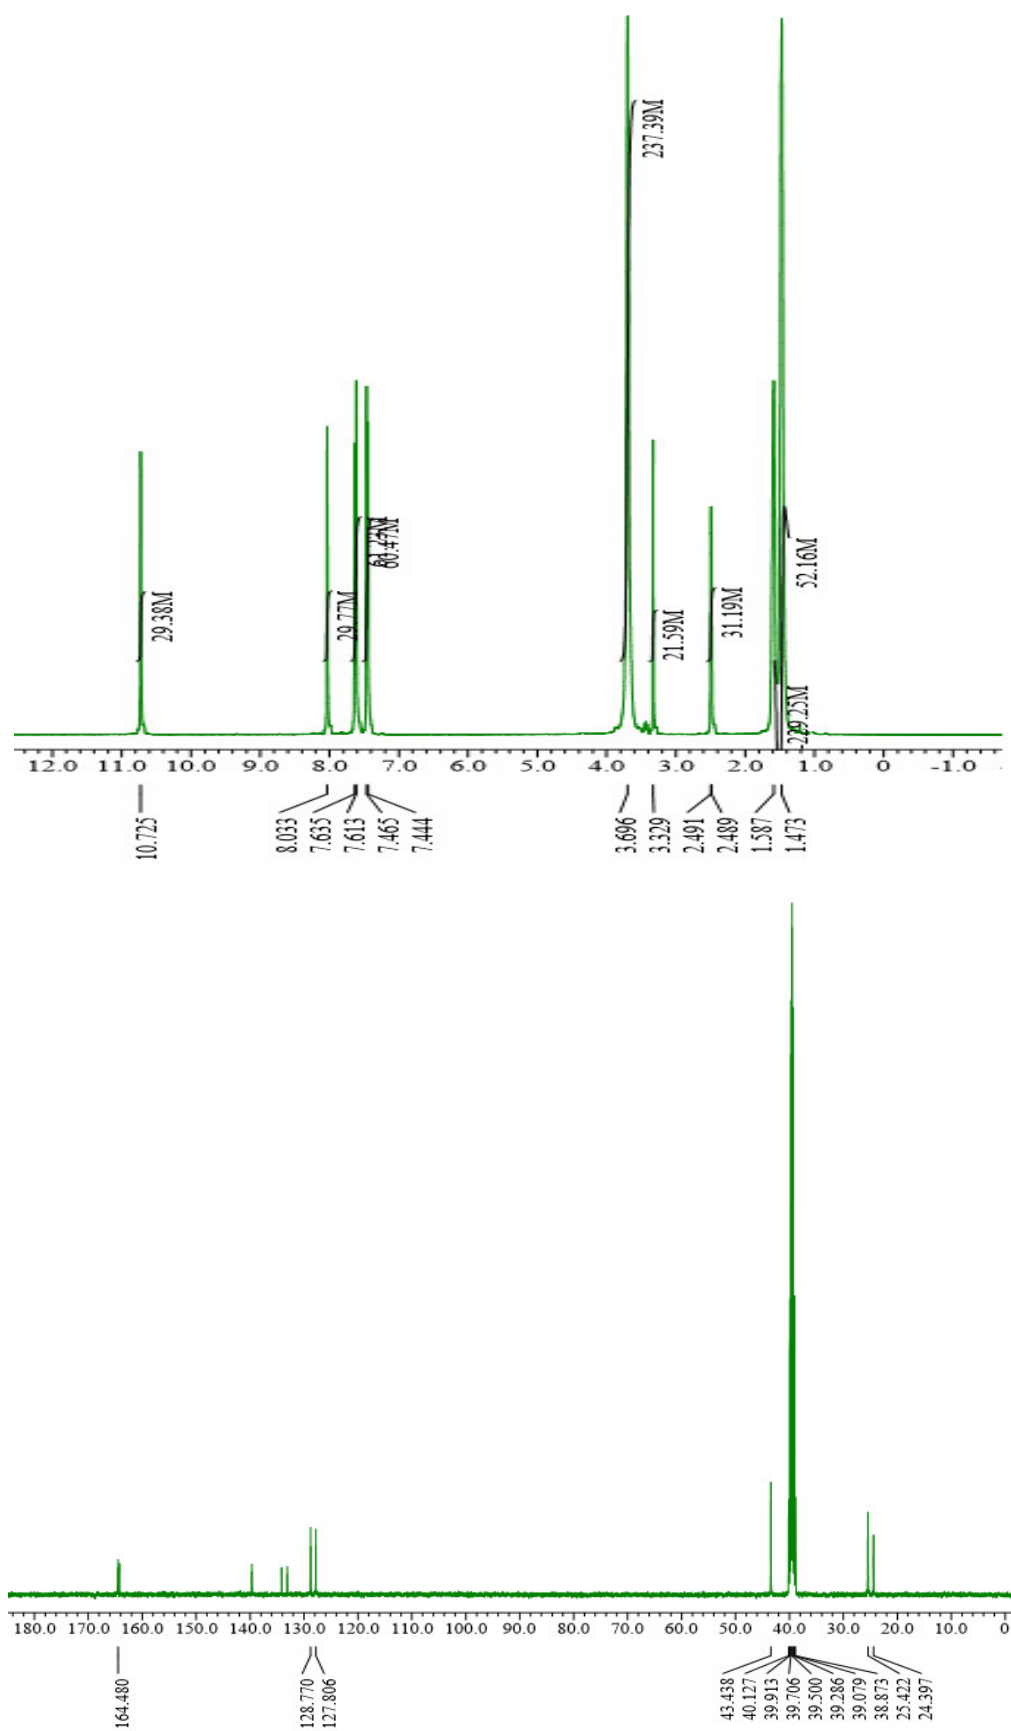

Figure S2. <sup>1</sup>H-NMR and <sup>13</sup>C-NMR for compound 7b.

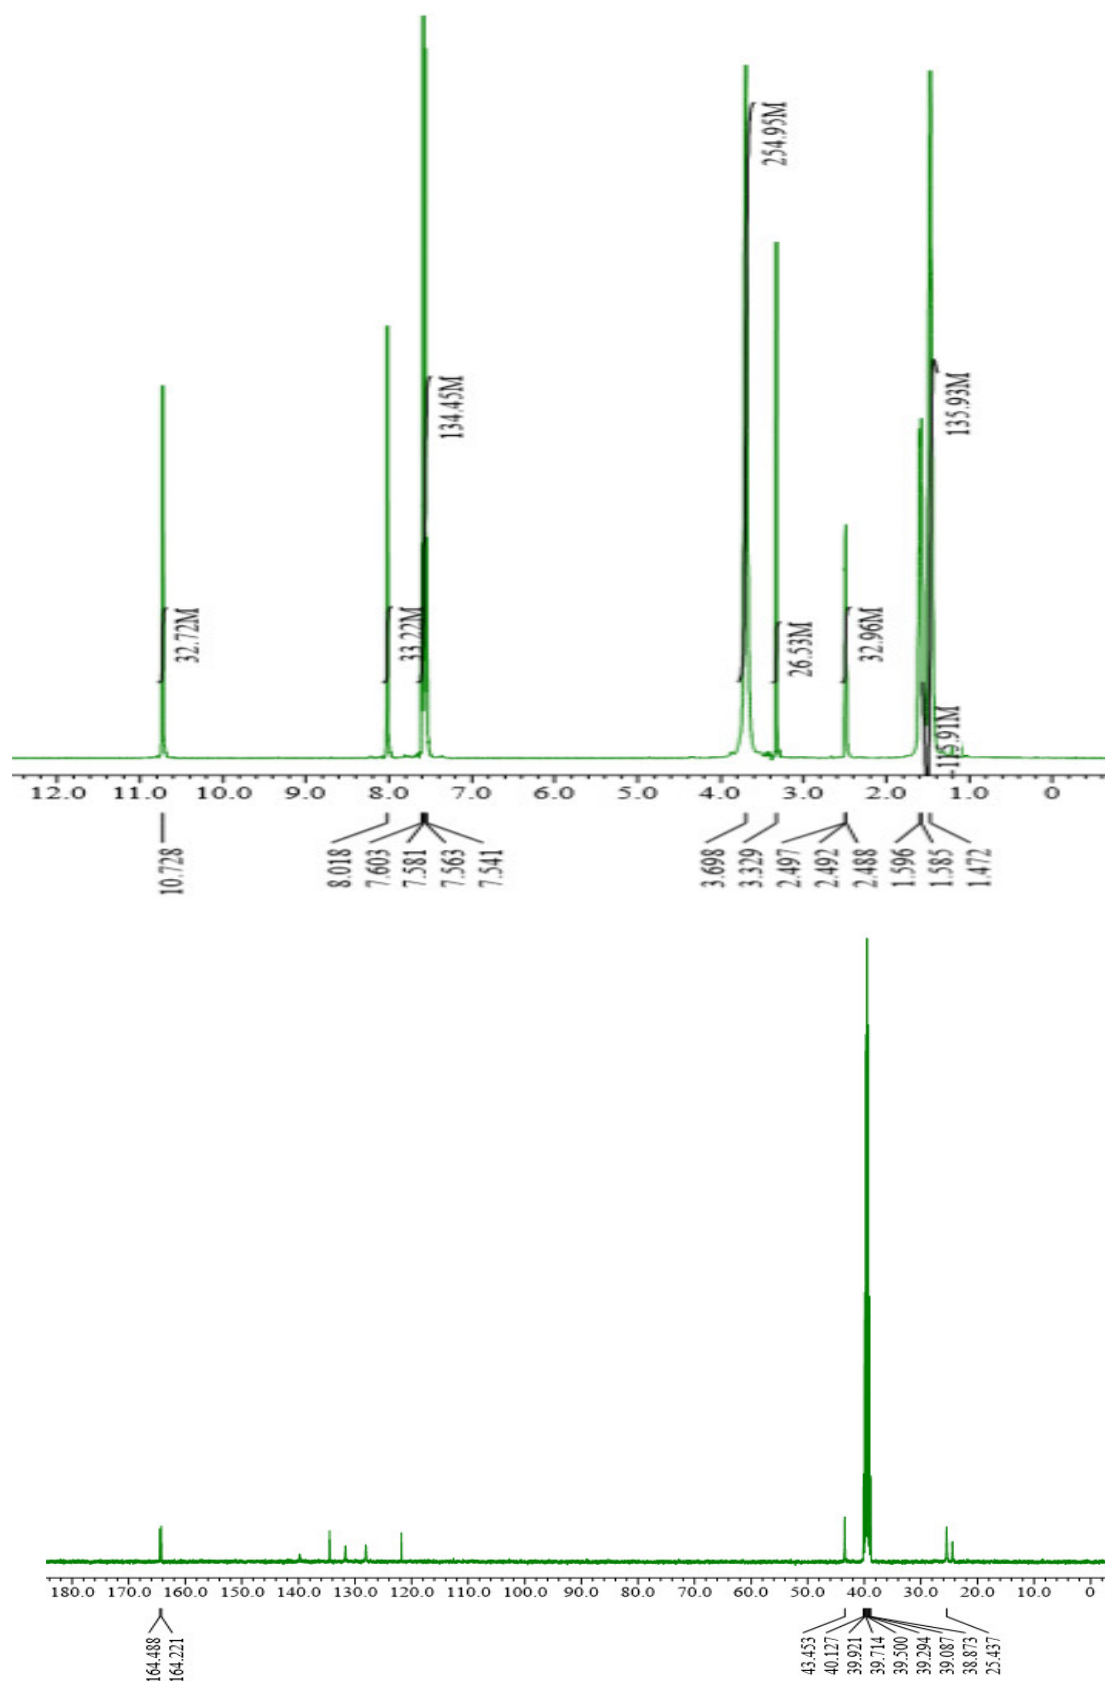

Figure S3. <sup>1</sup>H-NMR and <sup>13</sup>C-NMR for compound 7c.

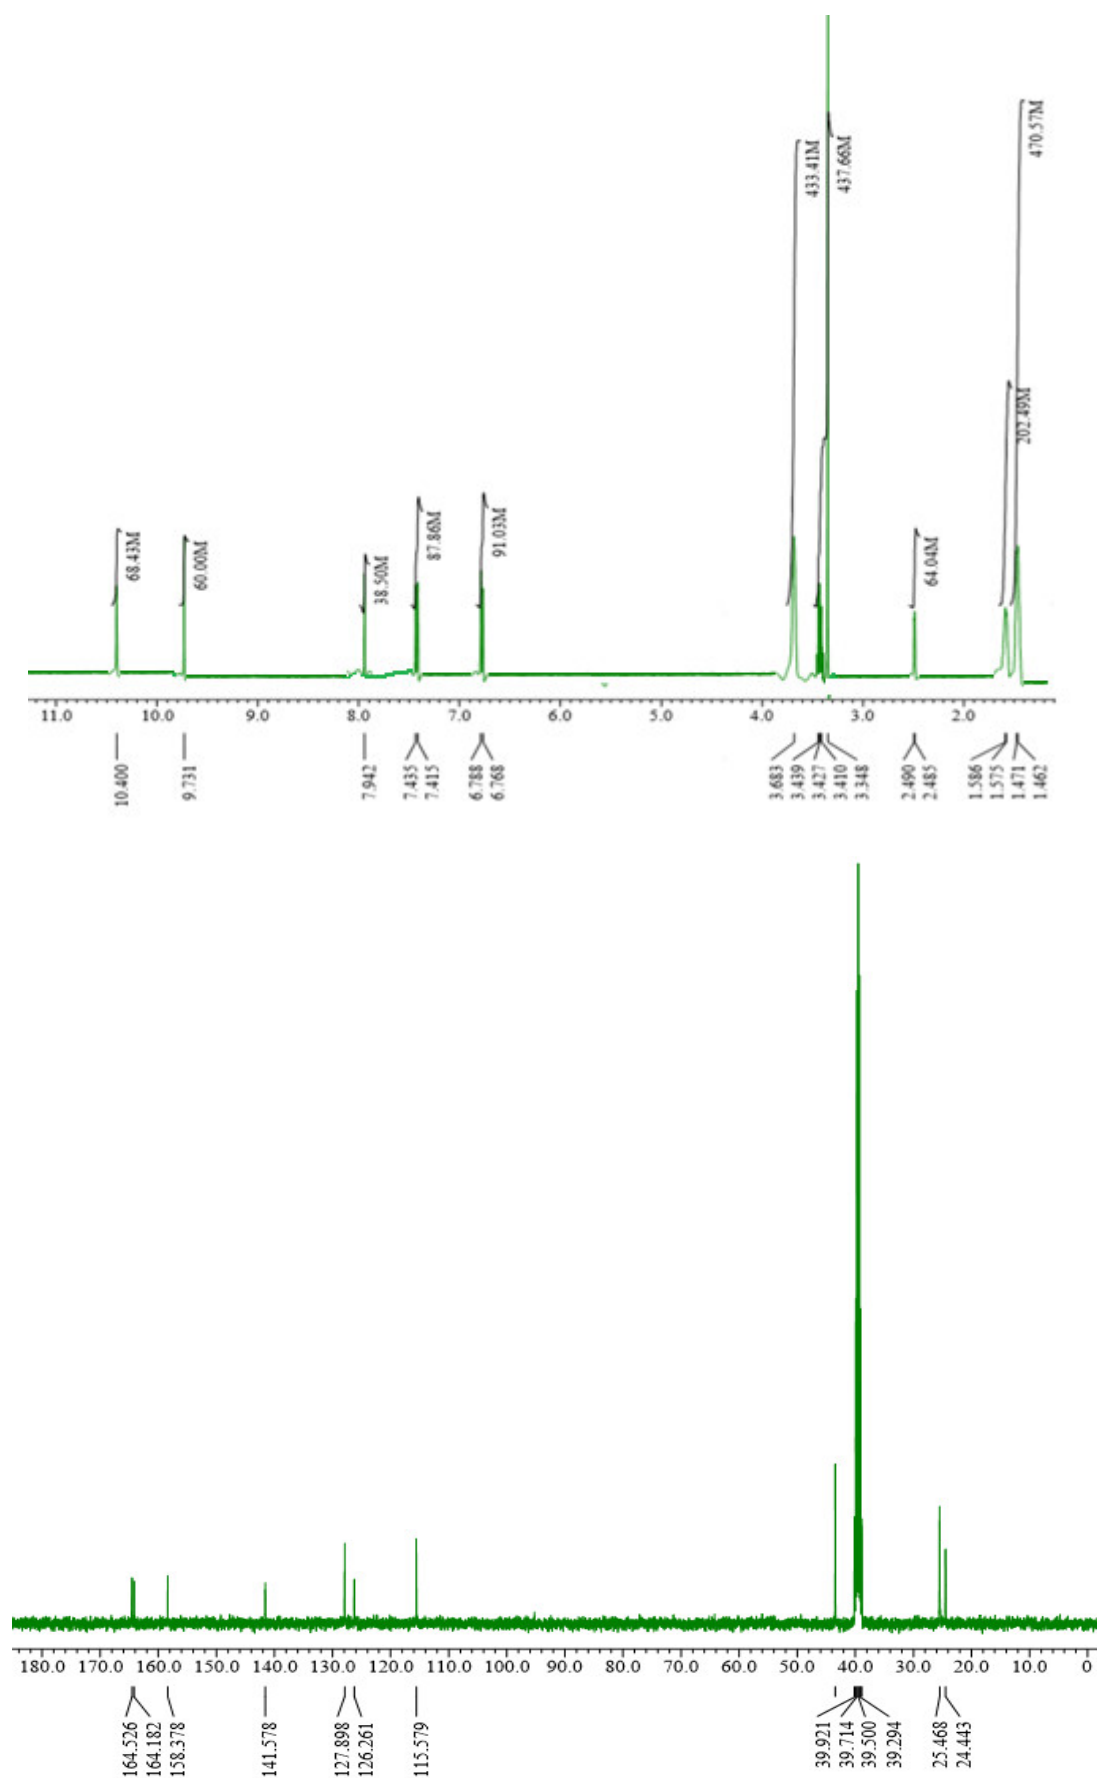

Figure S4. <sup>1</sup>H-NMR and <sup>13</sup>C-NMR for compound 7d.

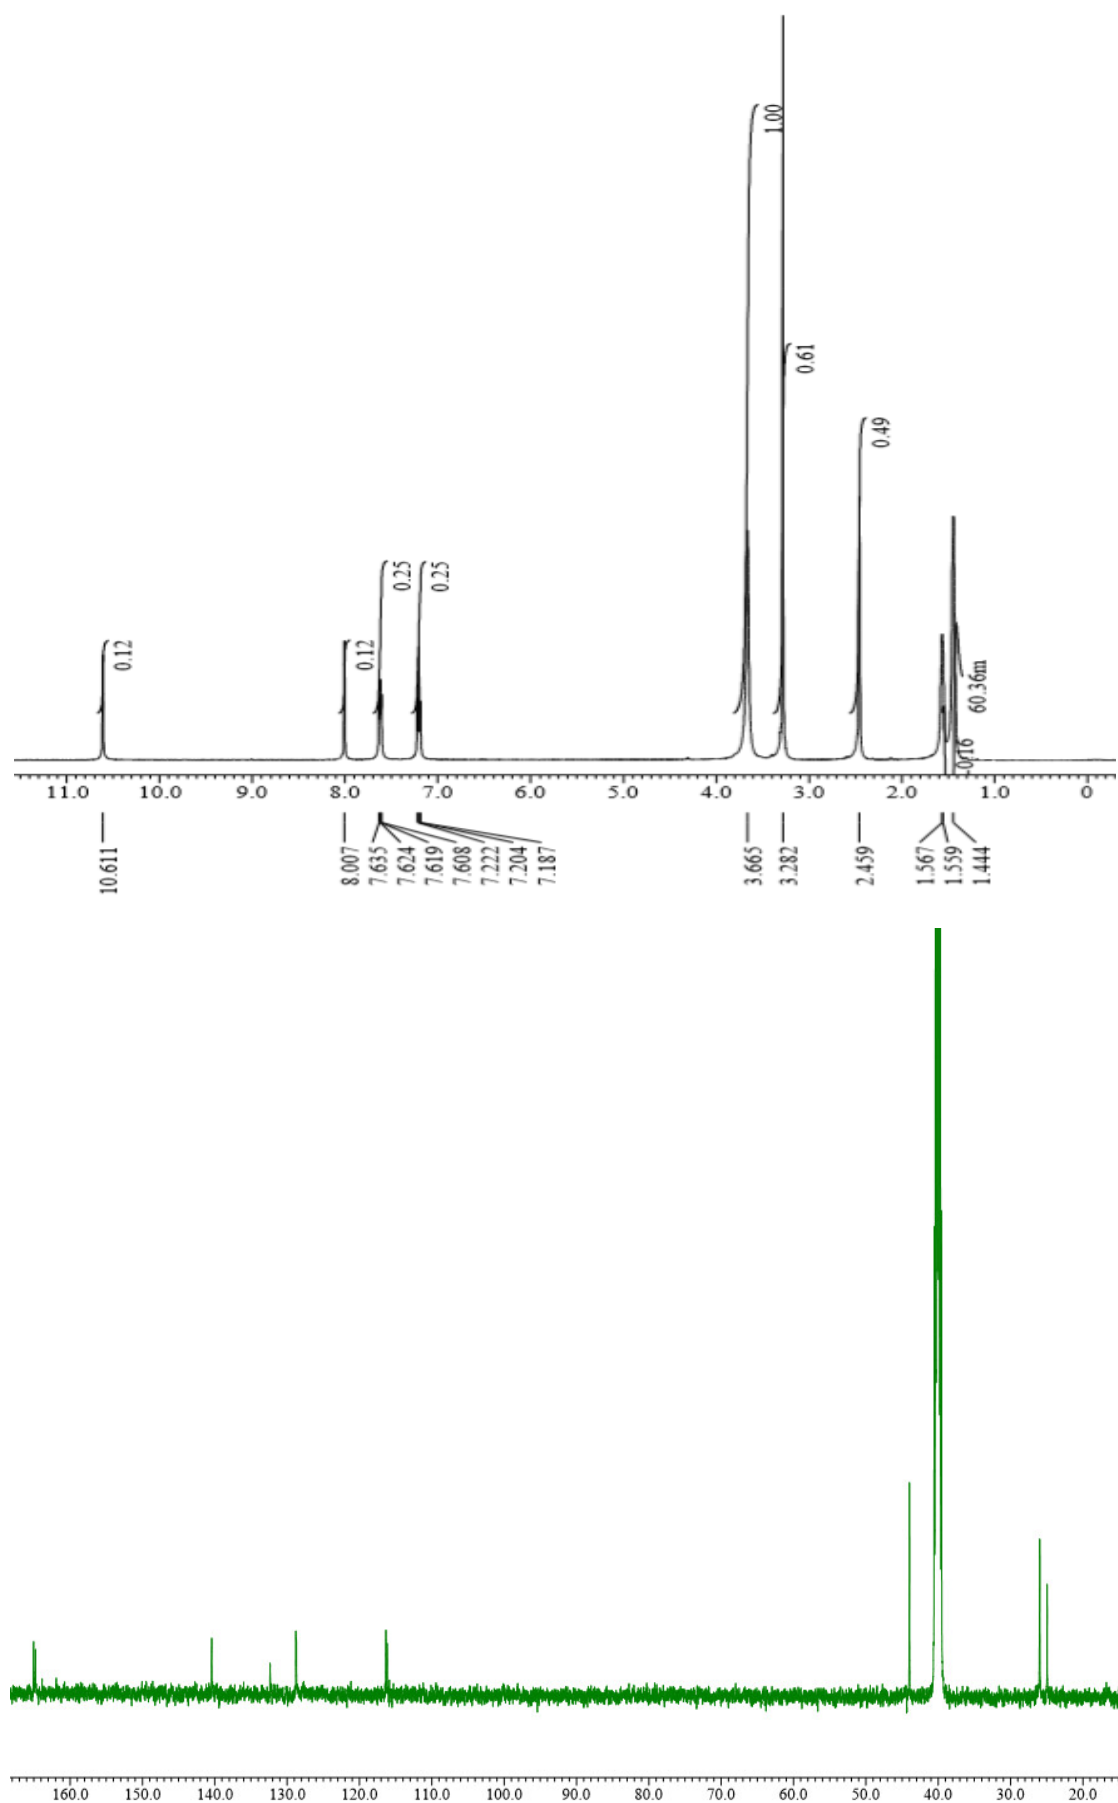

Figure S5. <sup>1</sup>H-NMR and <sup>13</sup>C-NMR for compound 7e.

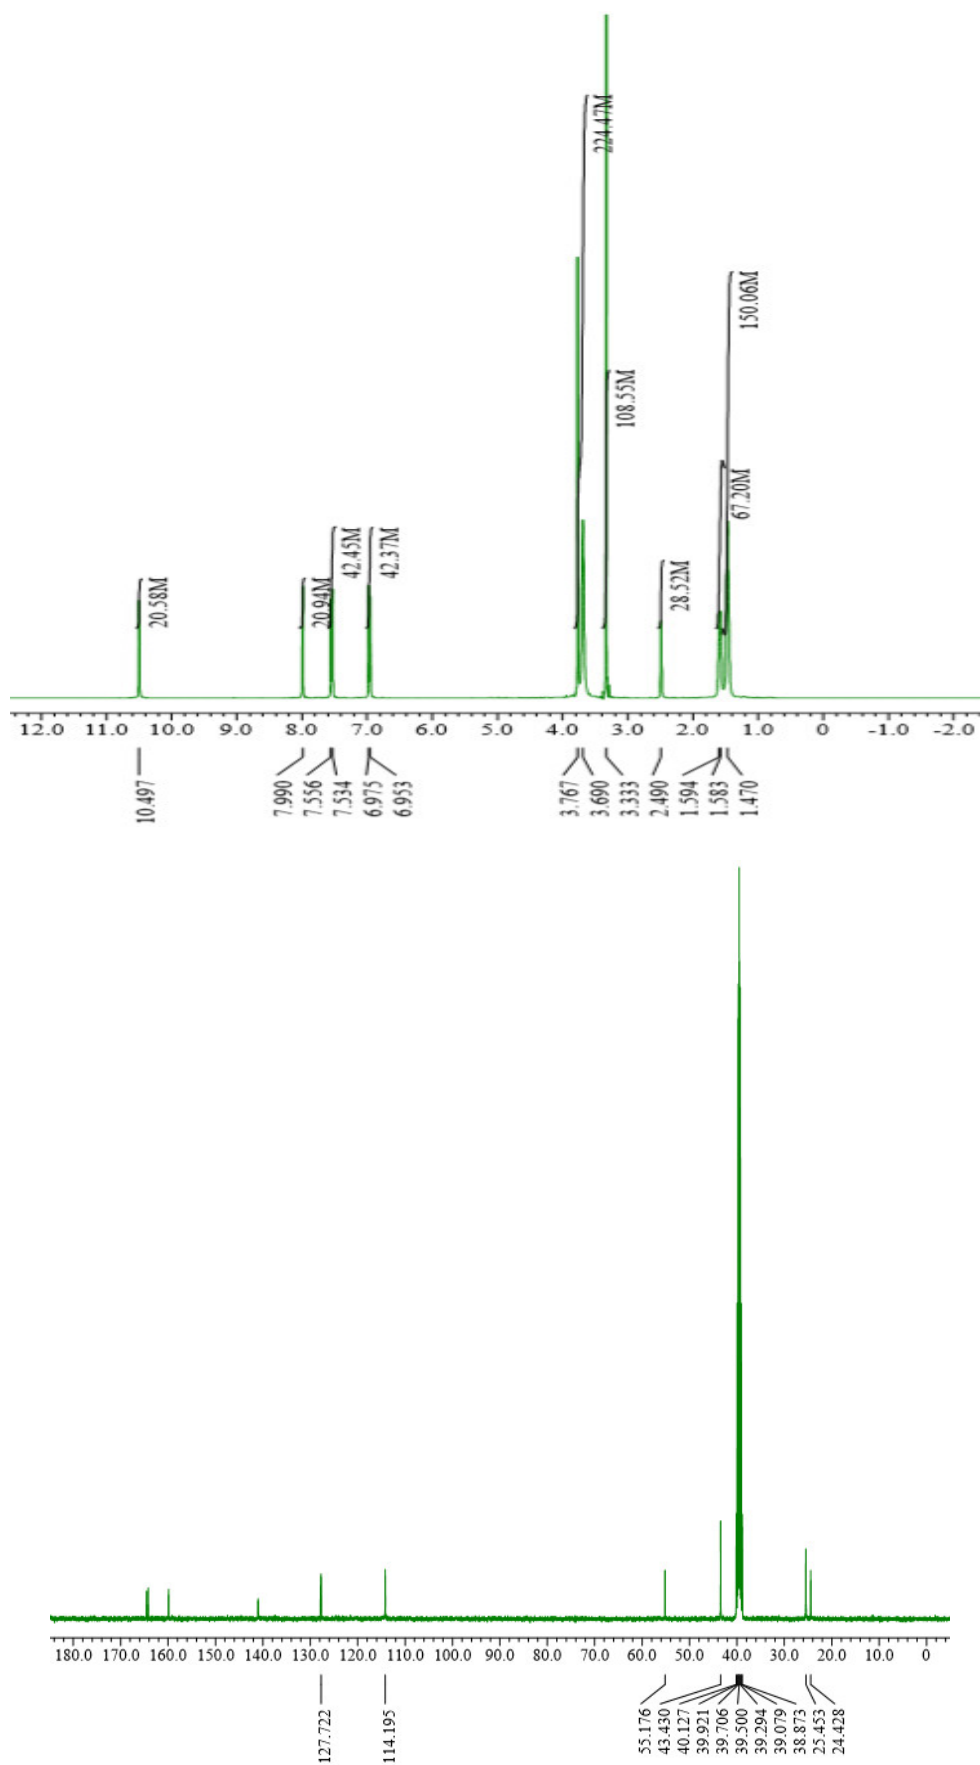

Figure S6.  $^1\text{H-NMR}$  and  $^{13}\text{C-NMR}$  for compound 7f.

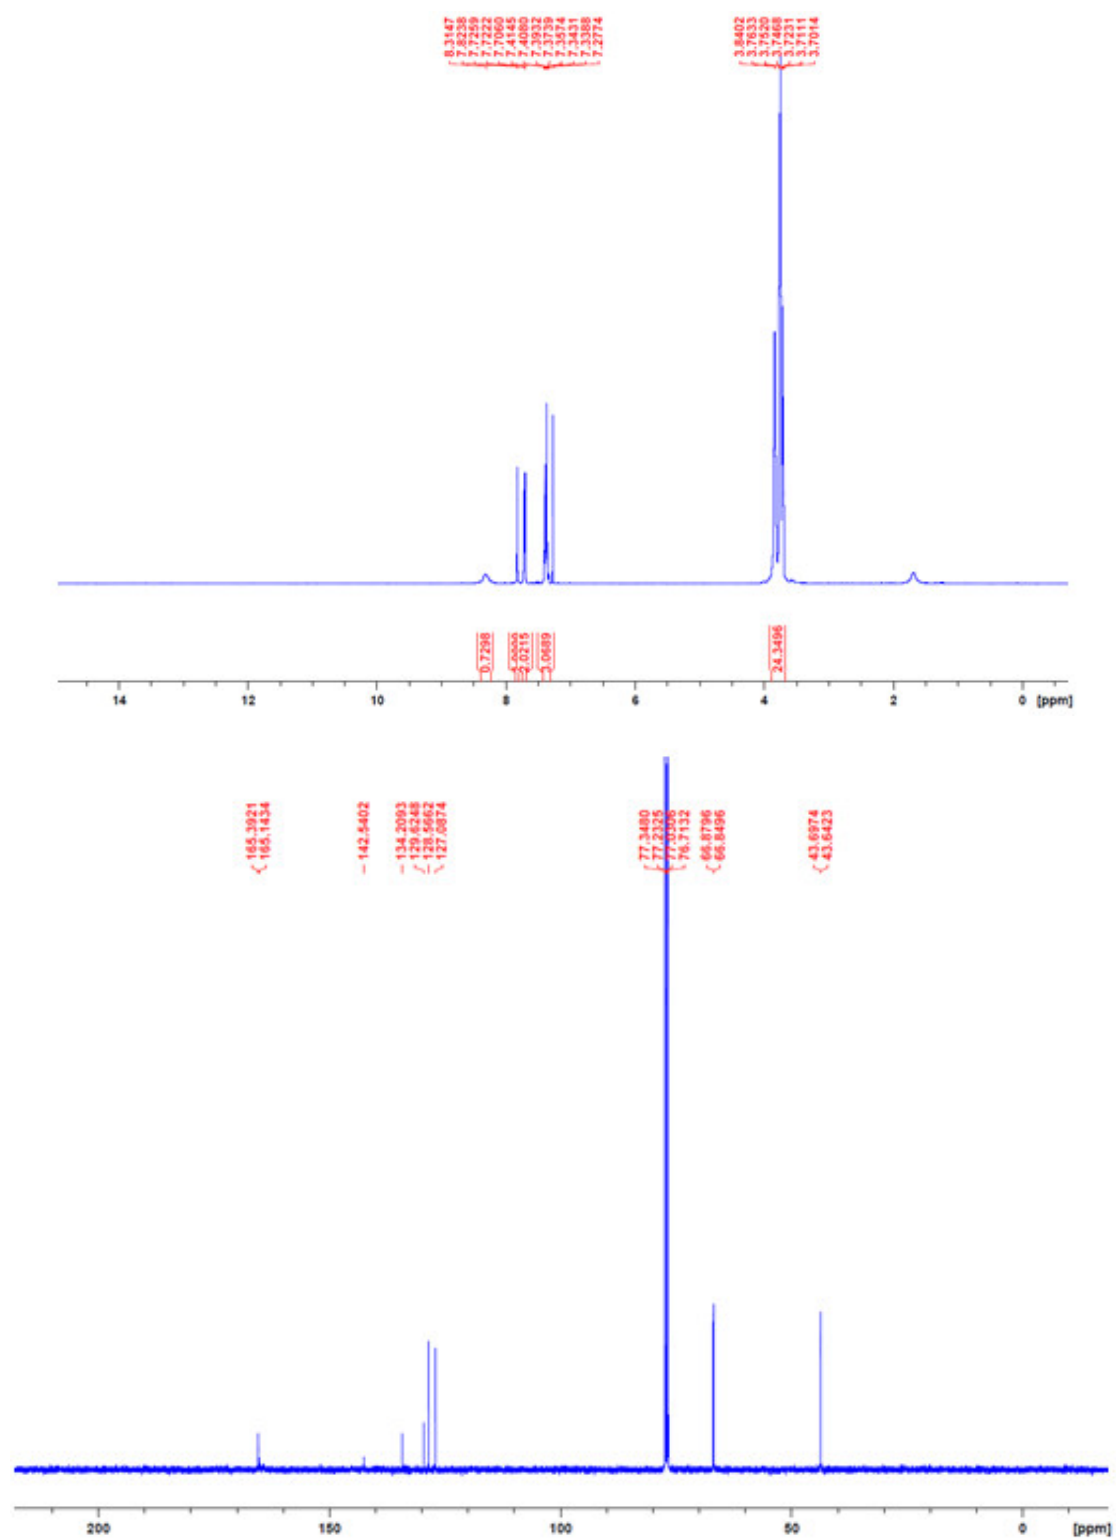Figure S7.  $^1\text{H-NMR}$  and  $^{13}\text{C-NMR}$  for compound 8a.



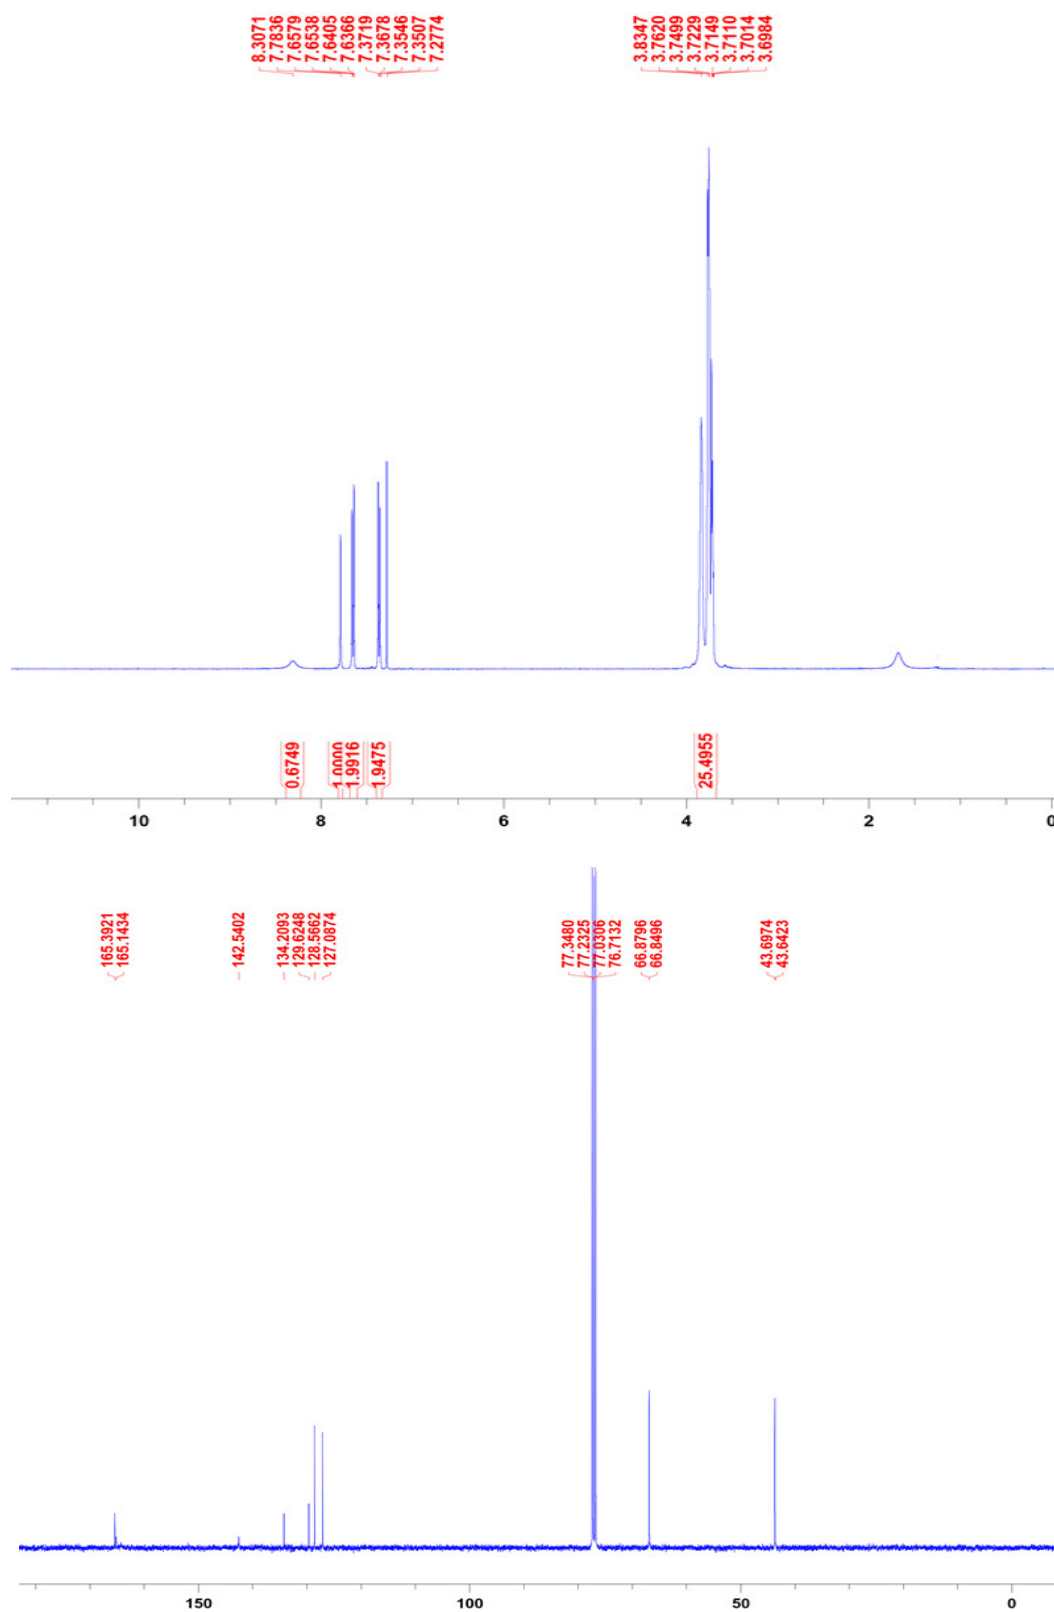Figure S8.  $^1\text{H-NMR}$  and  $^{13}\text{C-NMR}$  for compound 8b.

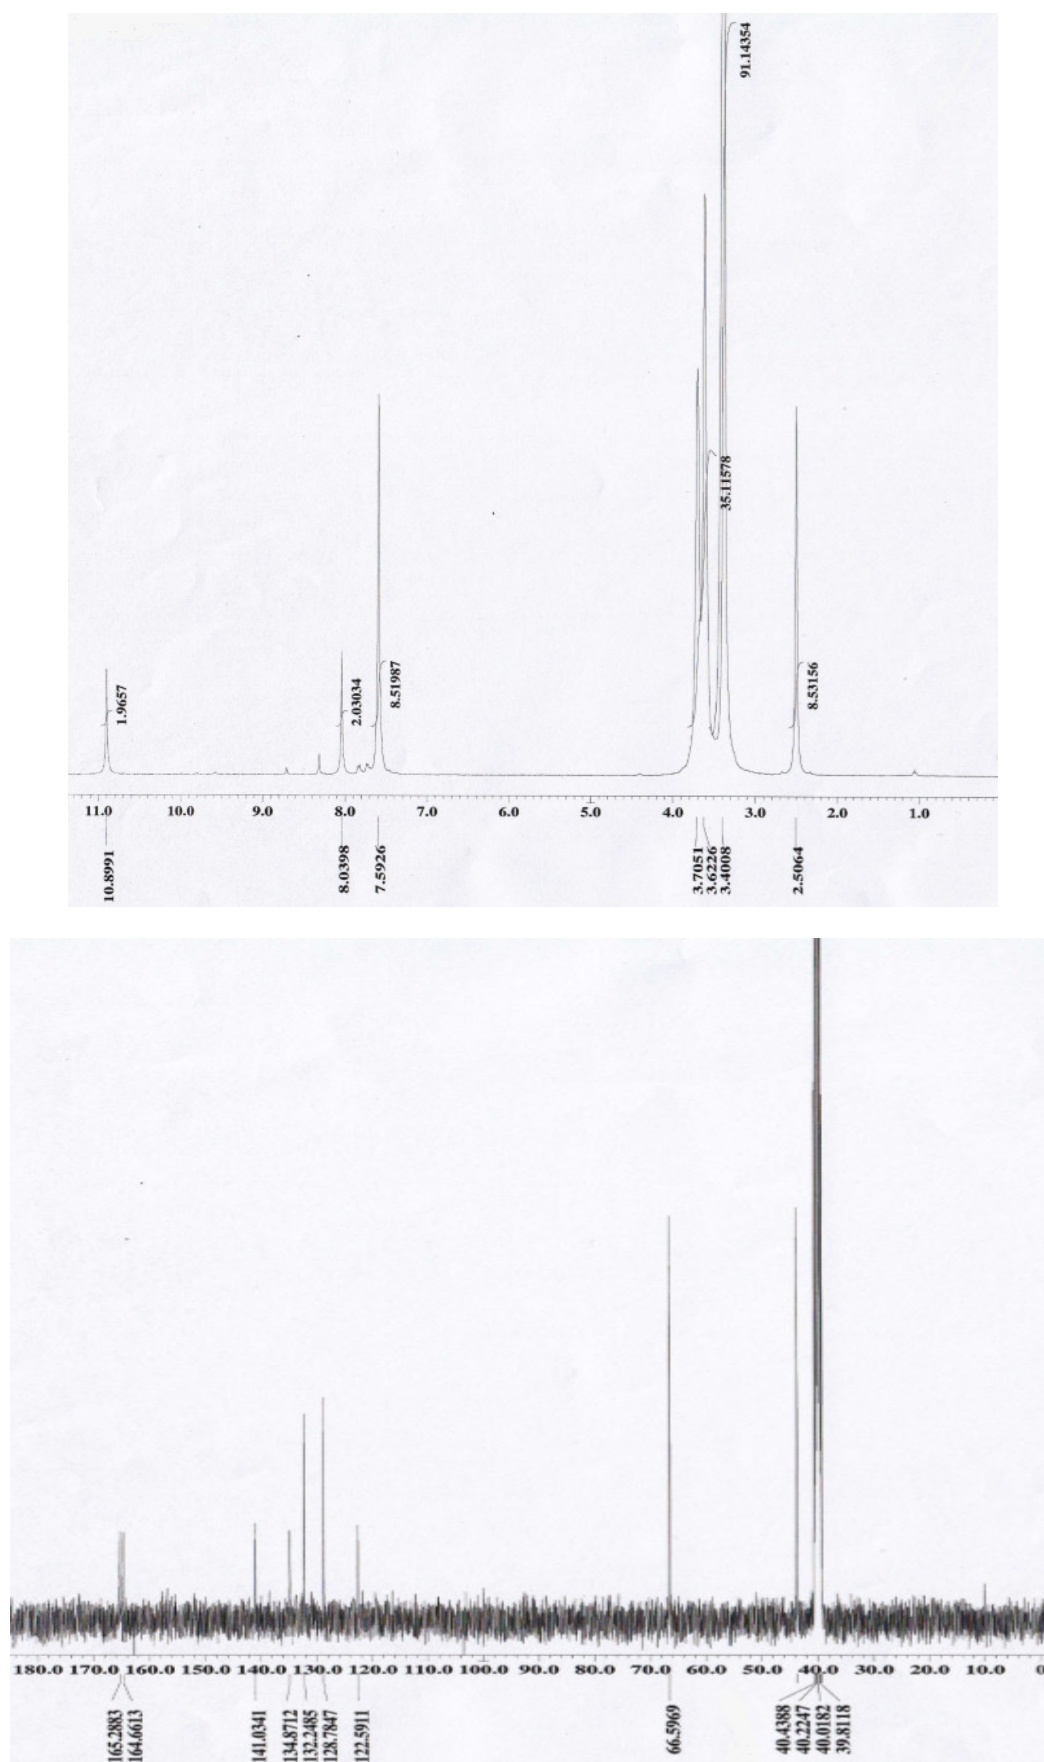

Figure S9.  $^1\text{H-NMR}$  and  $^{13}\text{C-NMR}$  for compound 8c.

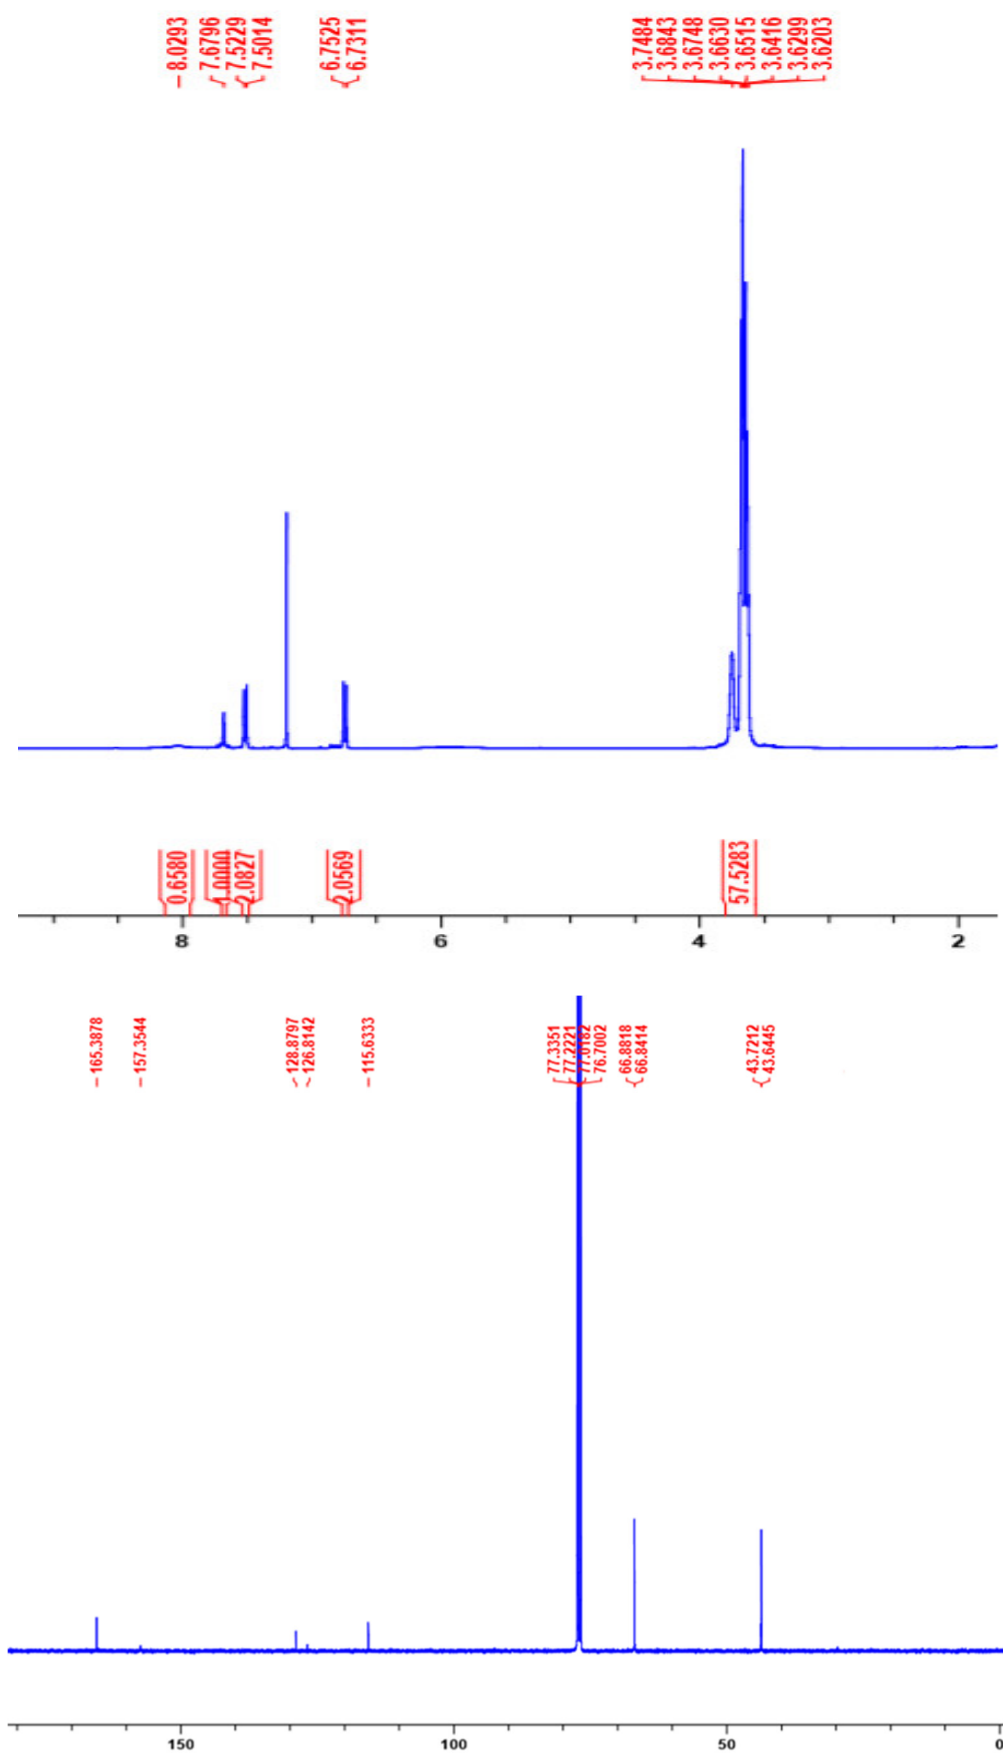Figure S10.  $^1\text{H}$ -NMR and  $^{13}\text{C}$ -NMR for compound 8d.

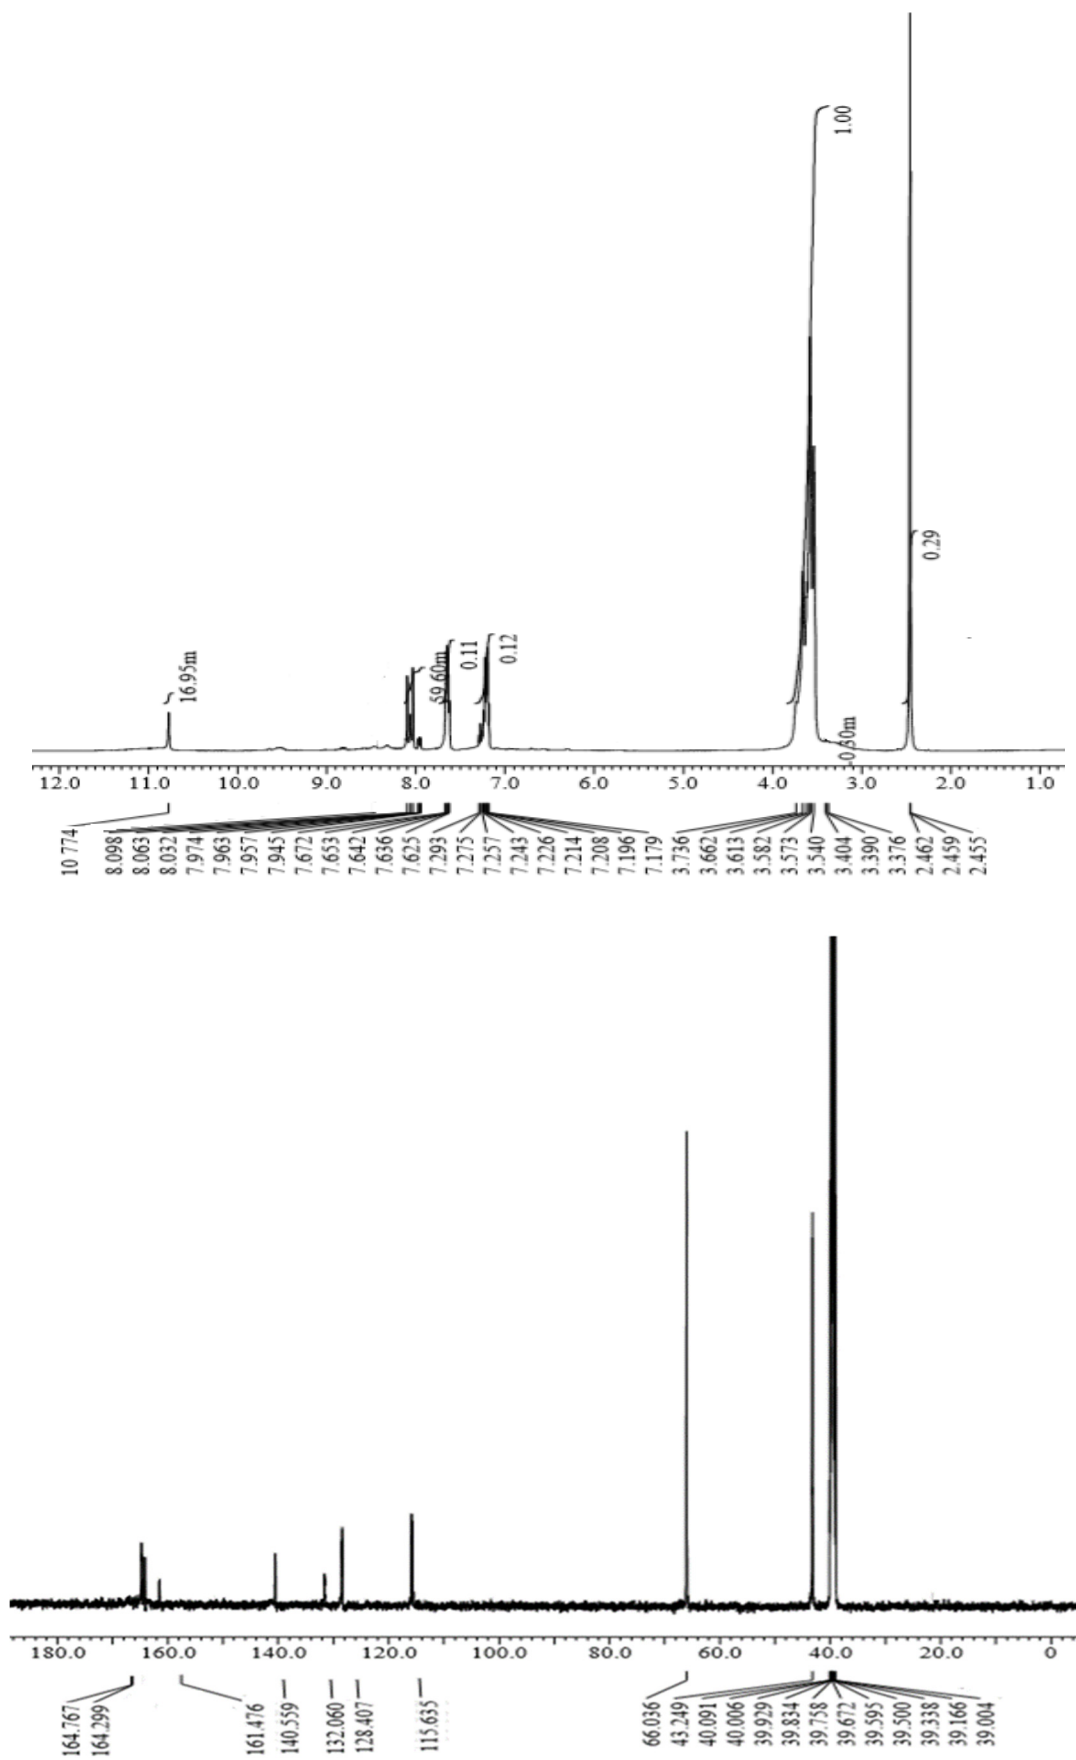Figure S11.  $^1\text{H-NMR}$  and  $^{13}\text{C-NMR}$  for compound 8e.

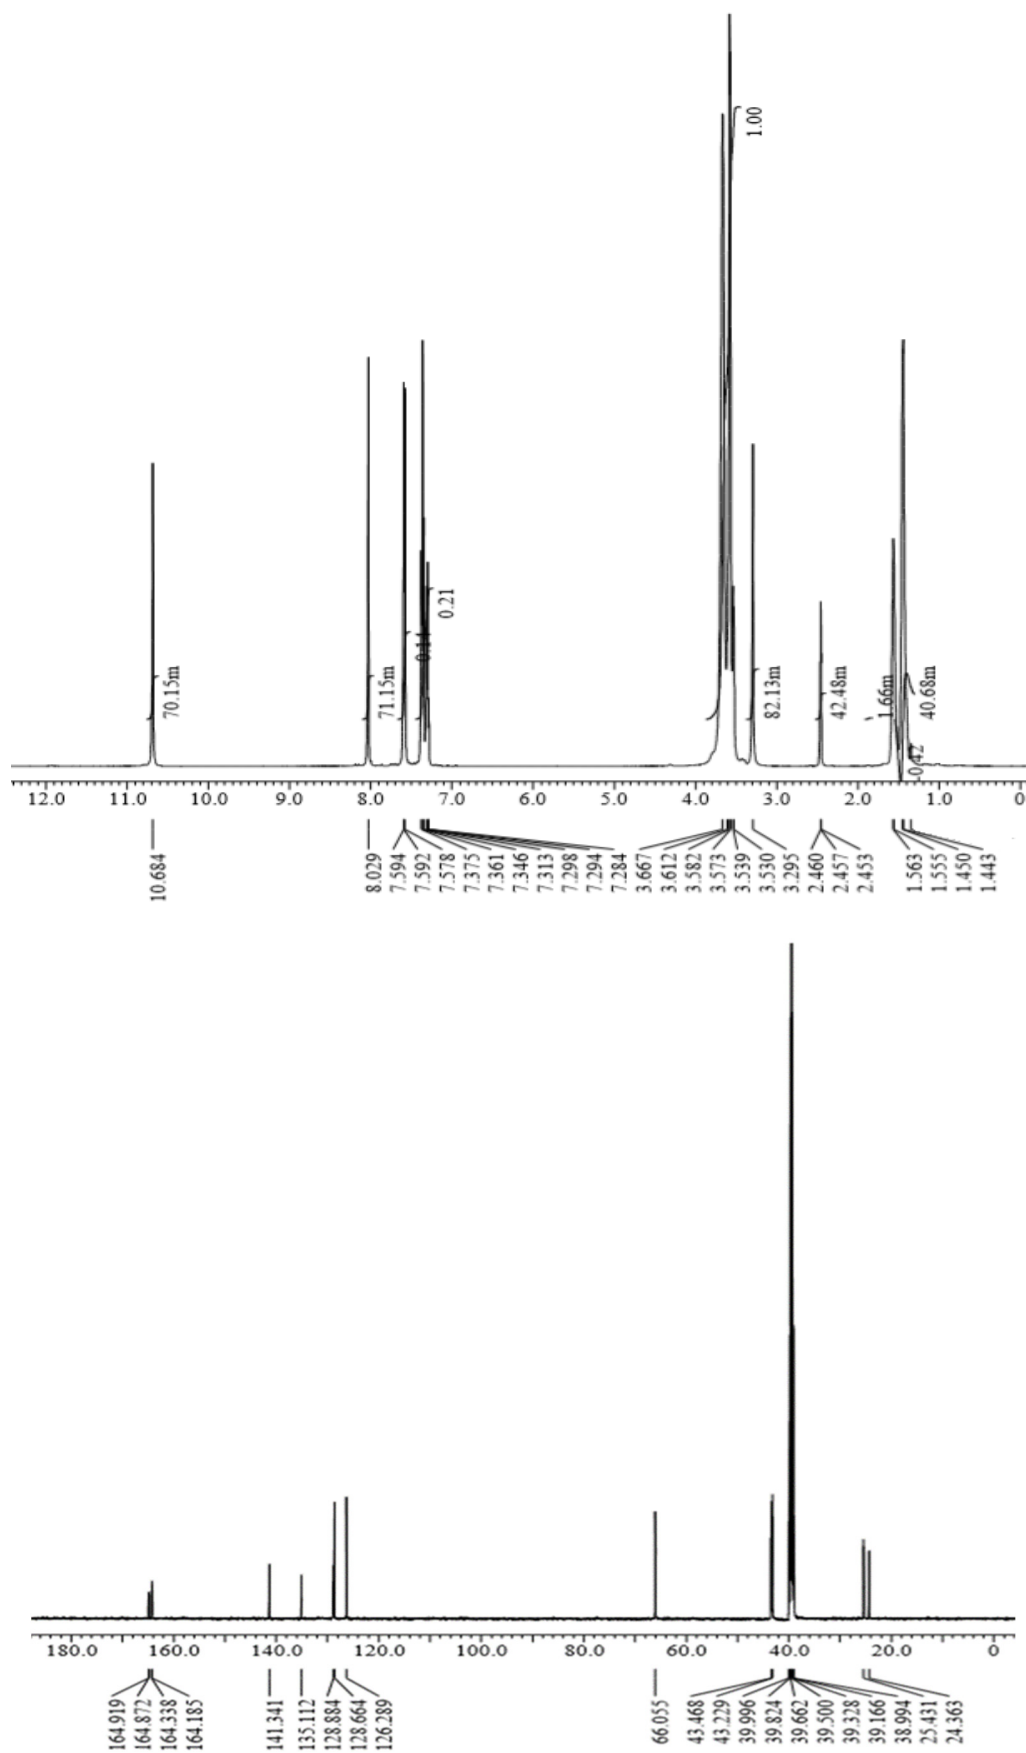Figure S12. <sup>1</sup>H-NMR and <sup>13</sup>C-NMR for compound 9a.

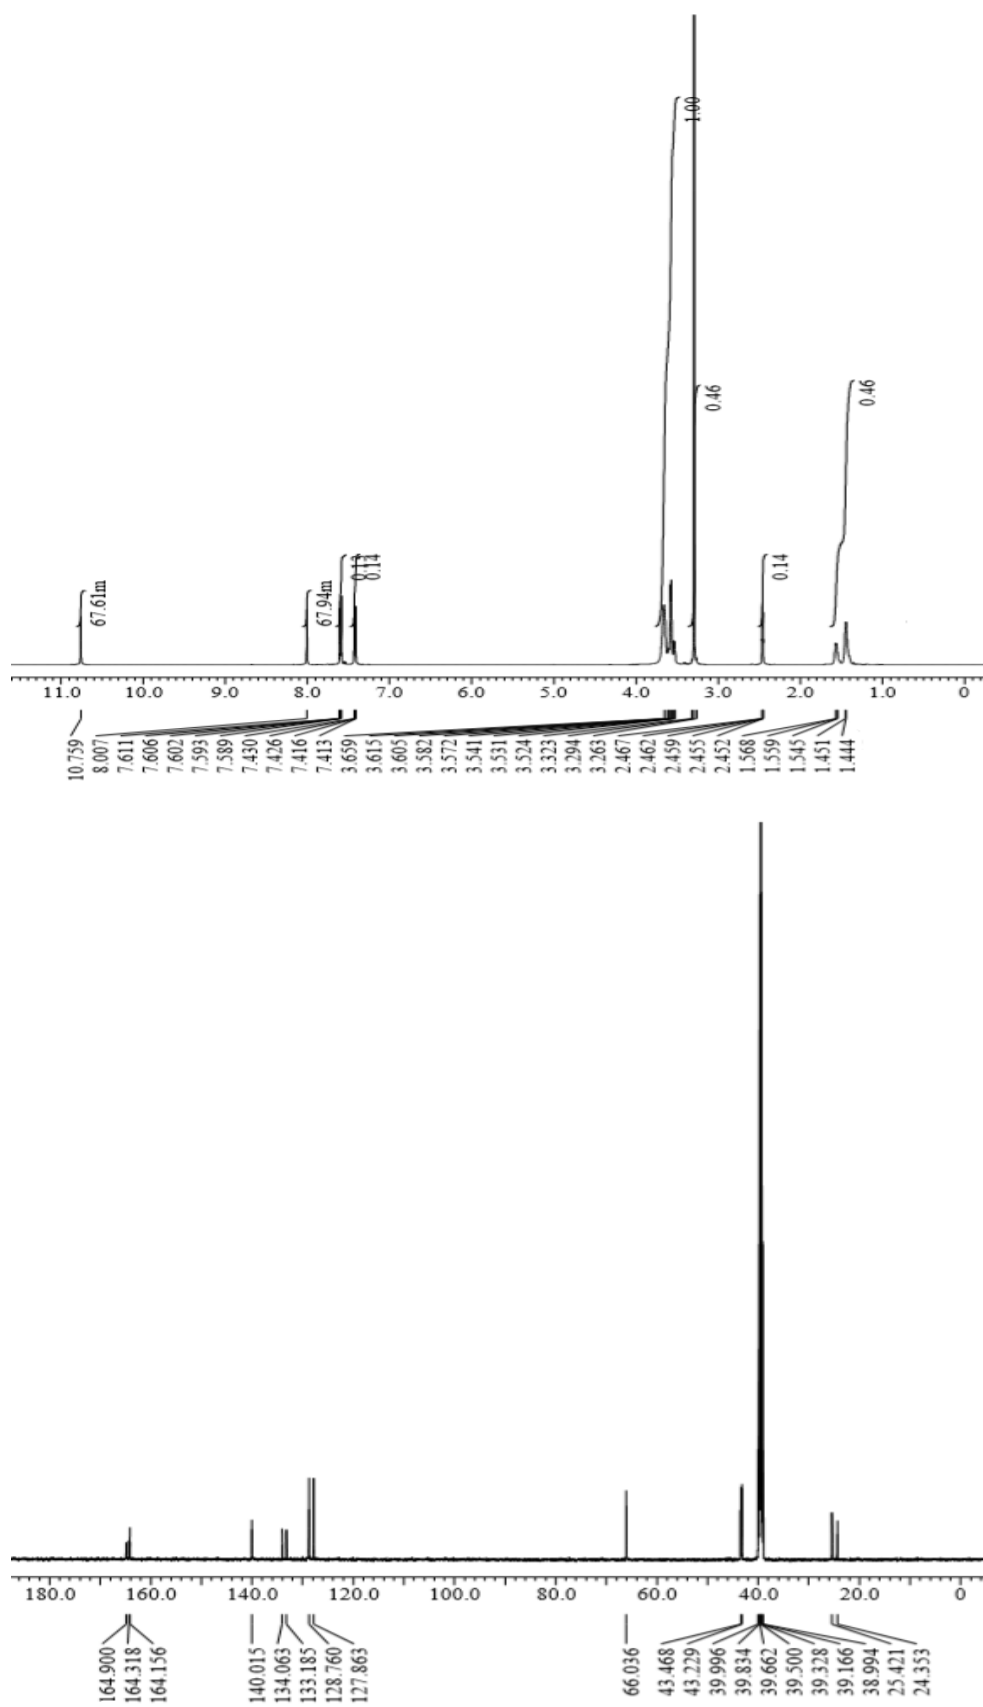

Figure S13.  $^1\text{H-NMR}$  and  $^{13}\text{C-NMR}$  for compound 9b.

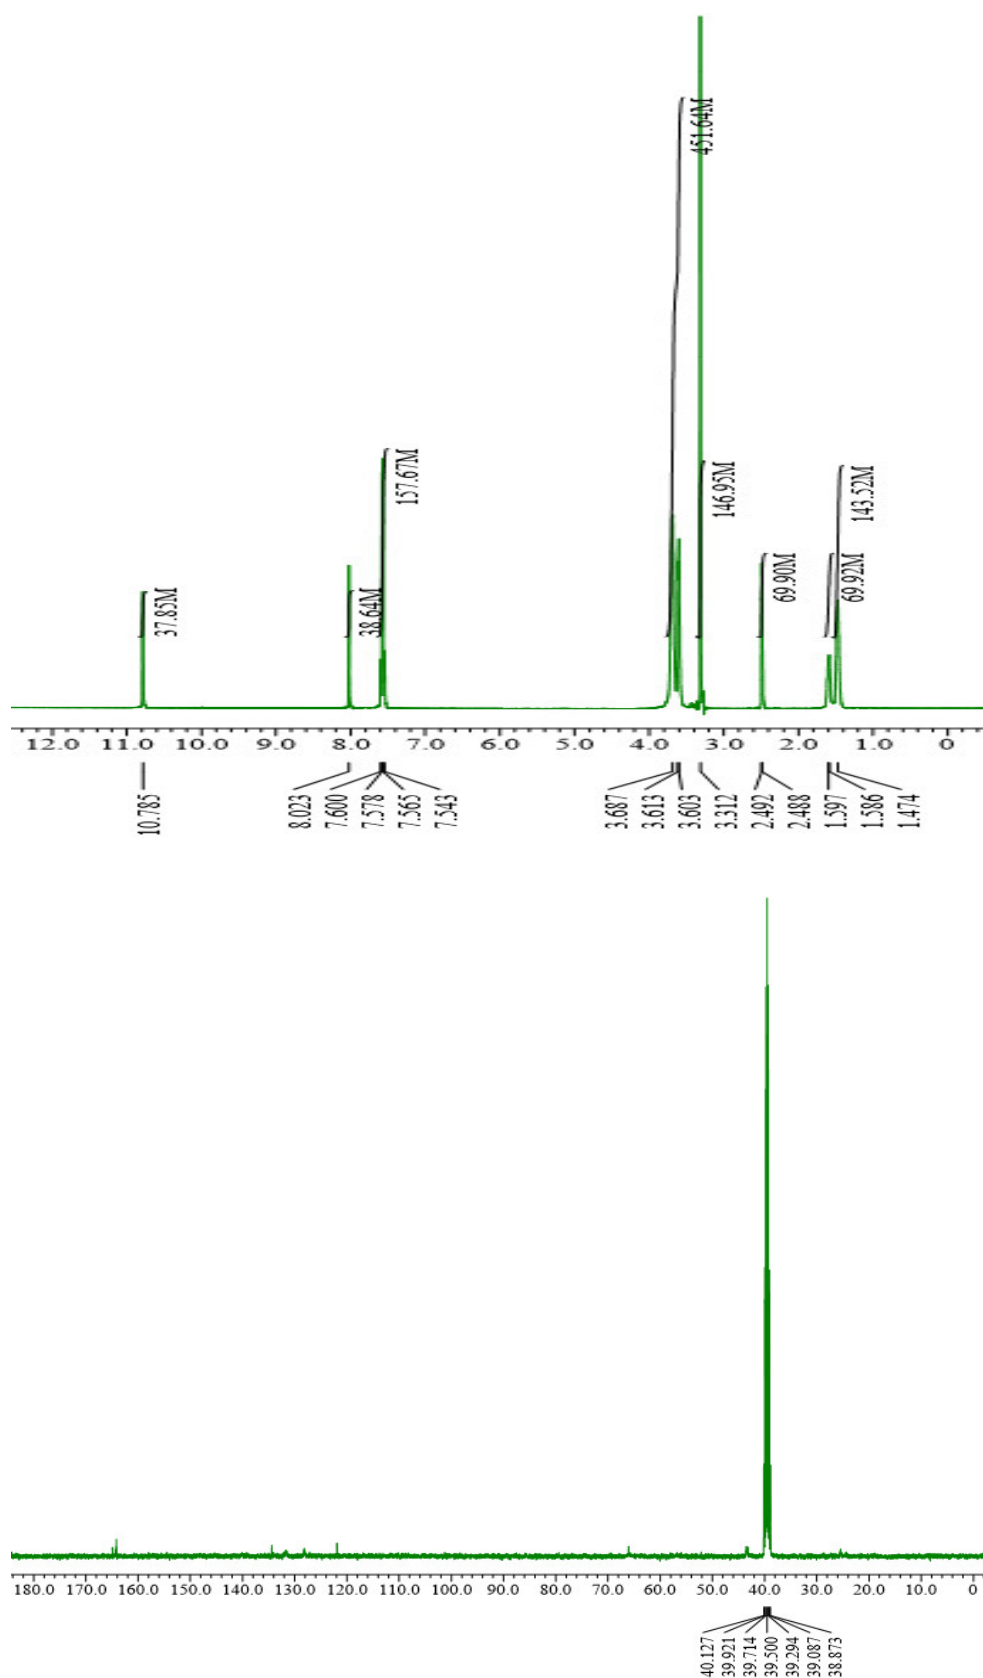

Figure S14.  $^1\text{H-NMR}$  and  $^{13}\text{C-NMR}$  for compound 9c.

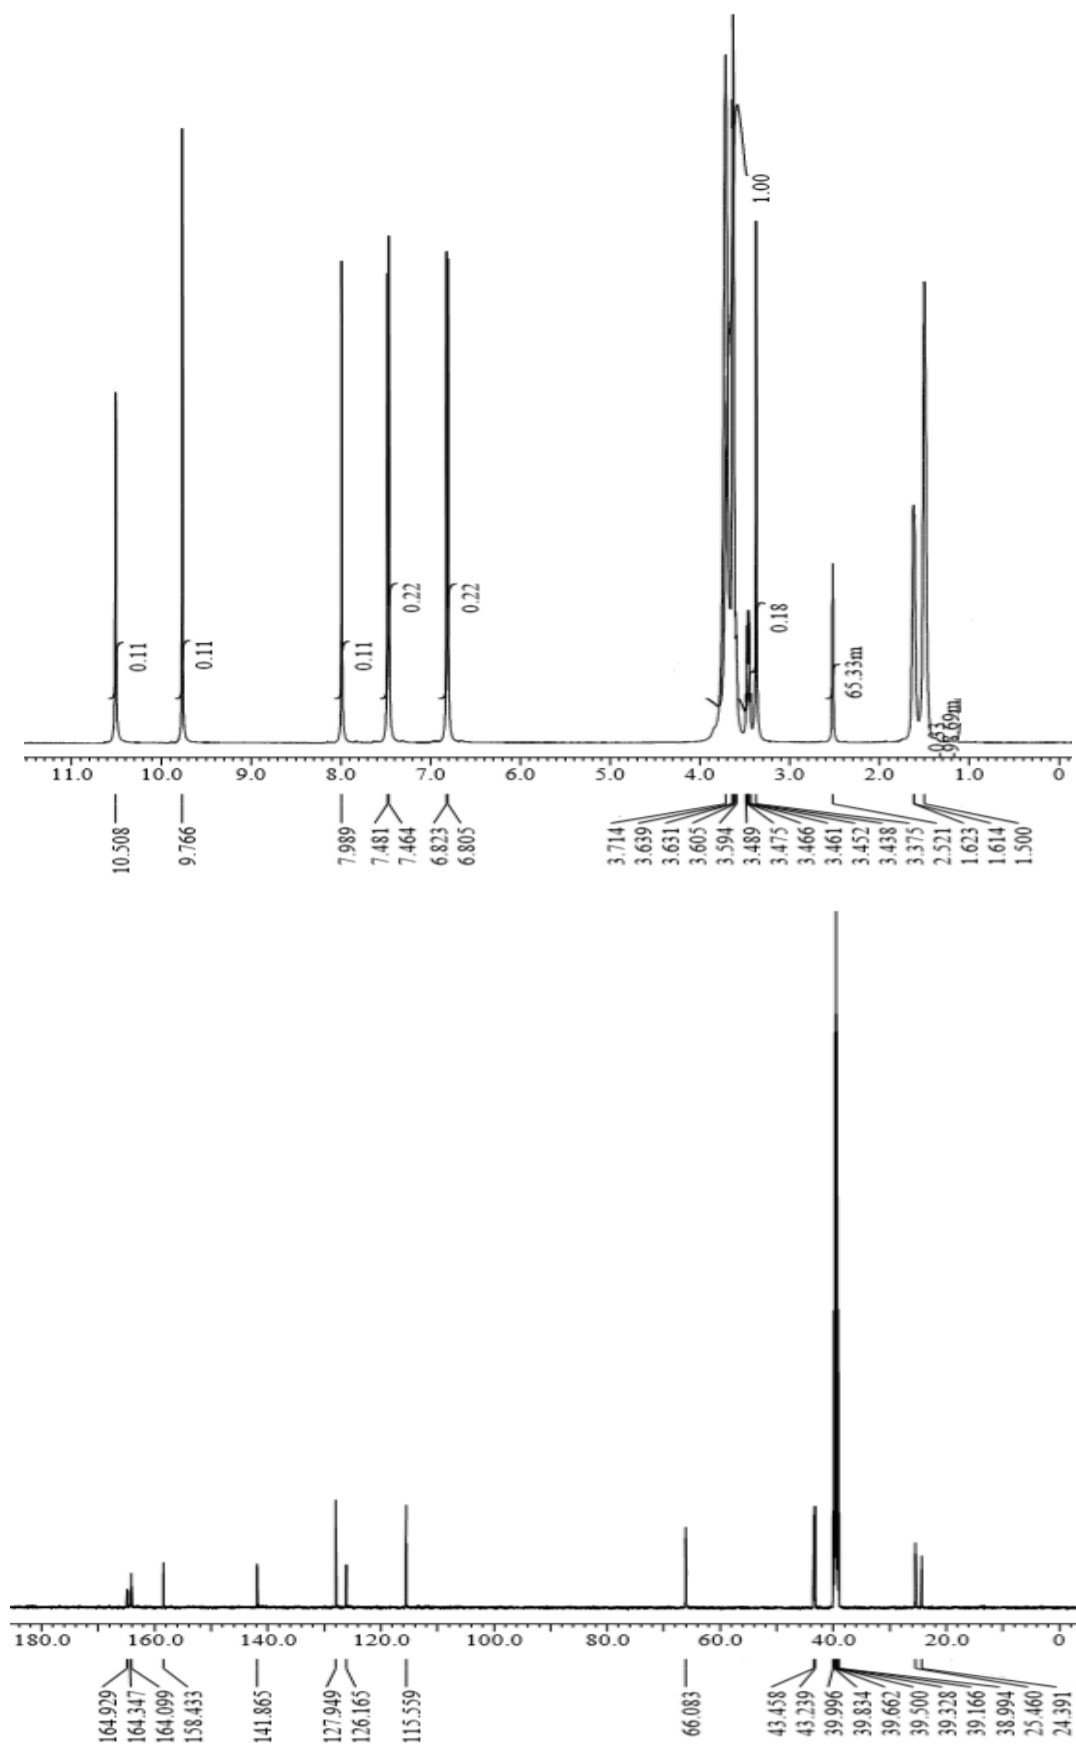Figure S15.  $^1\text{H-NMR}$  and  $^{13}\text{C-NMR}$  for compound 9d.



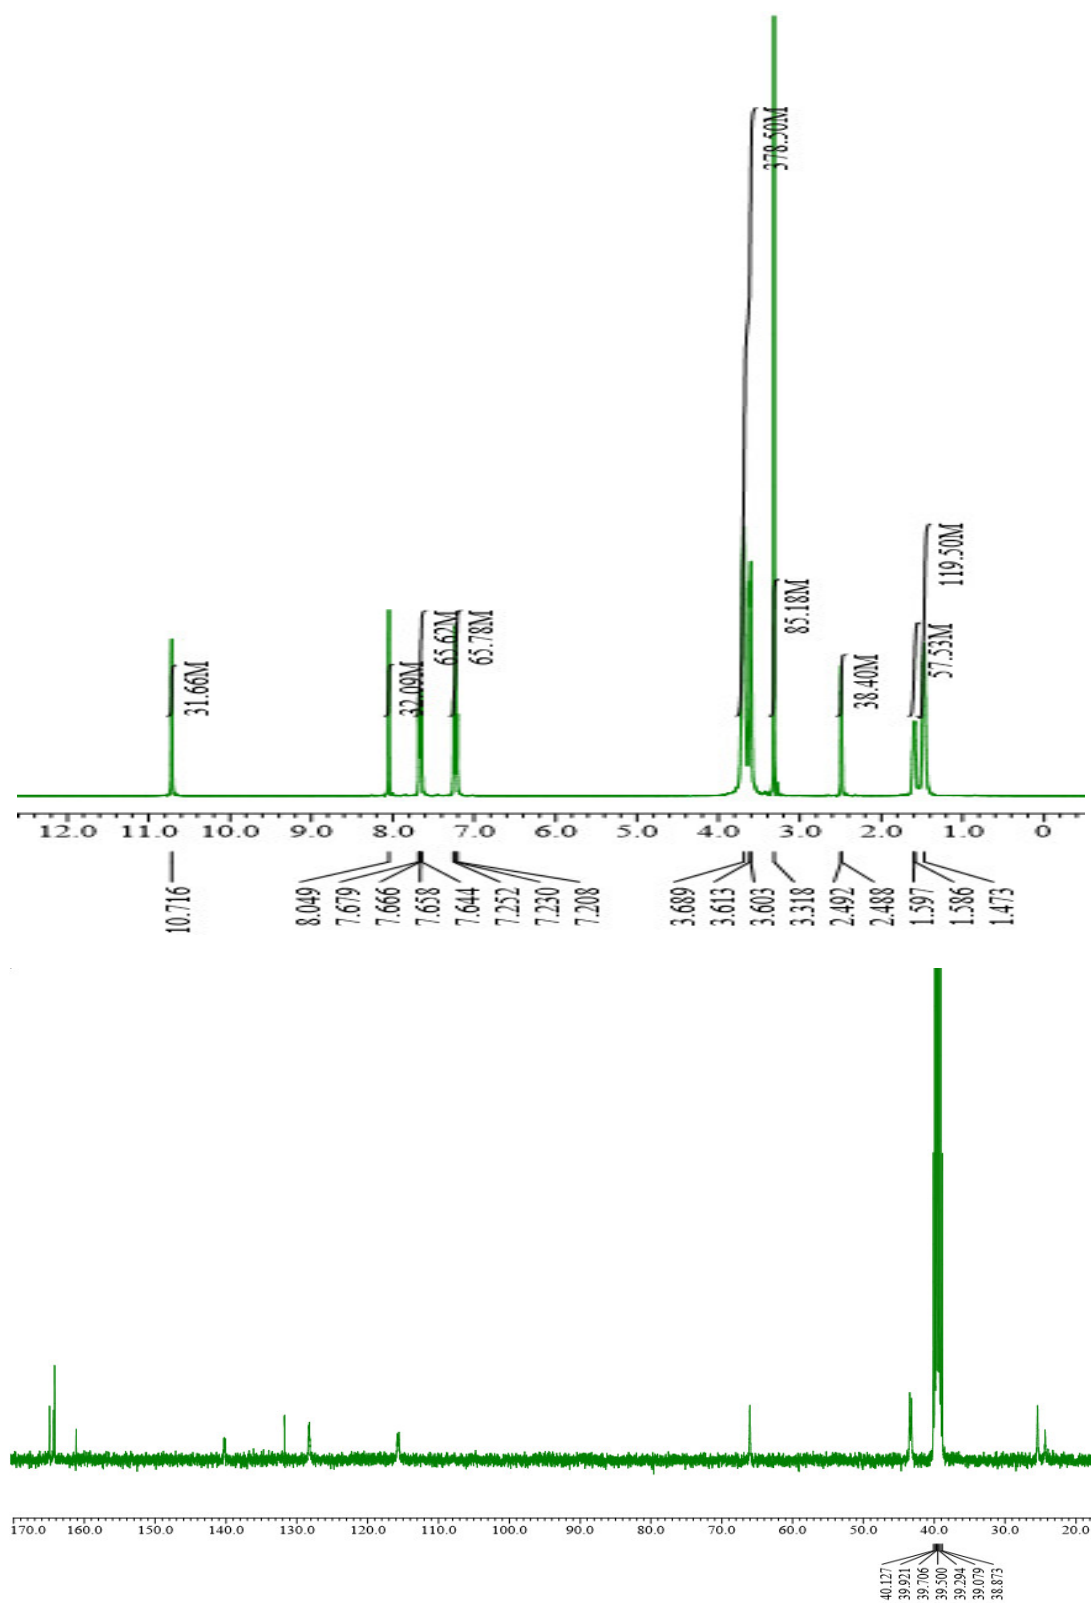

Figure S16.  $^1\text{H-NMR}$  and  $^{13}\text{C-NMR}$  for compound 9e.

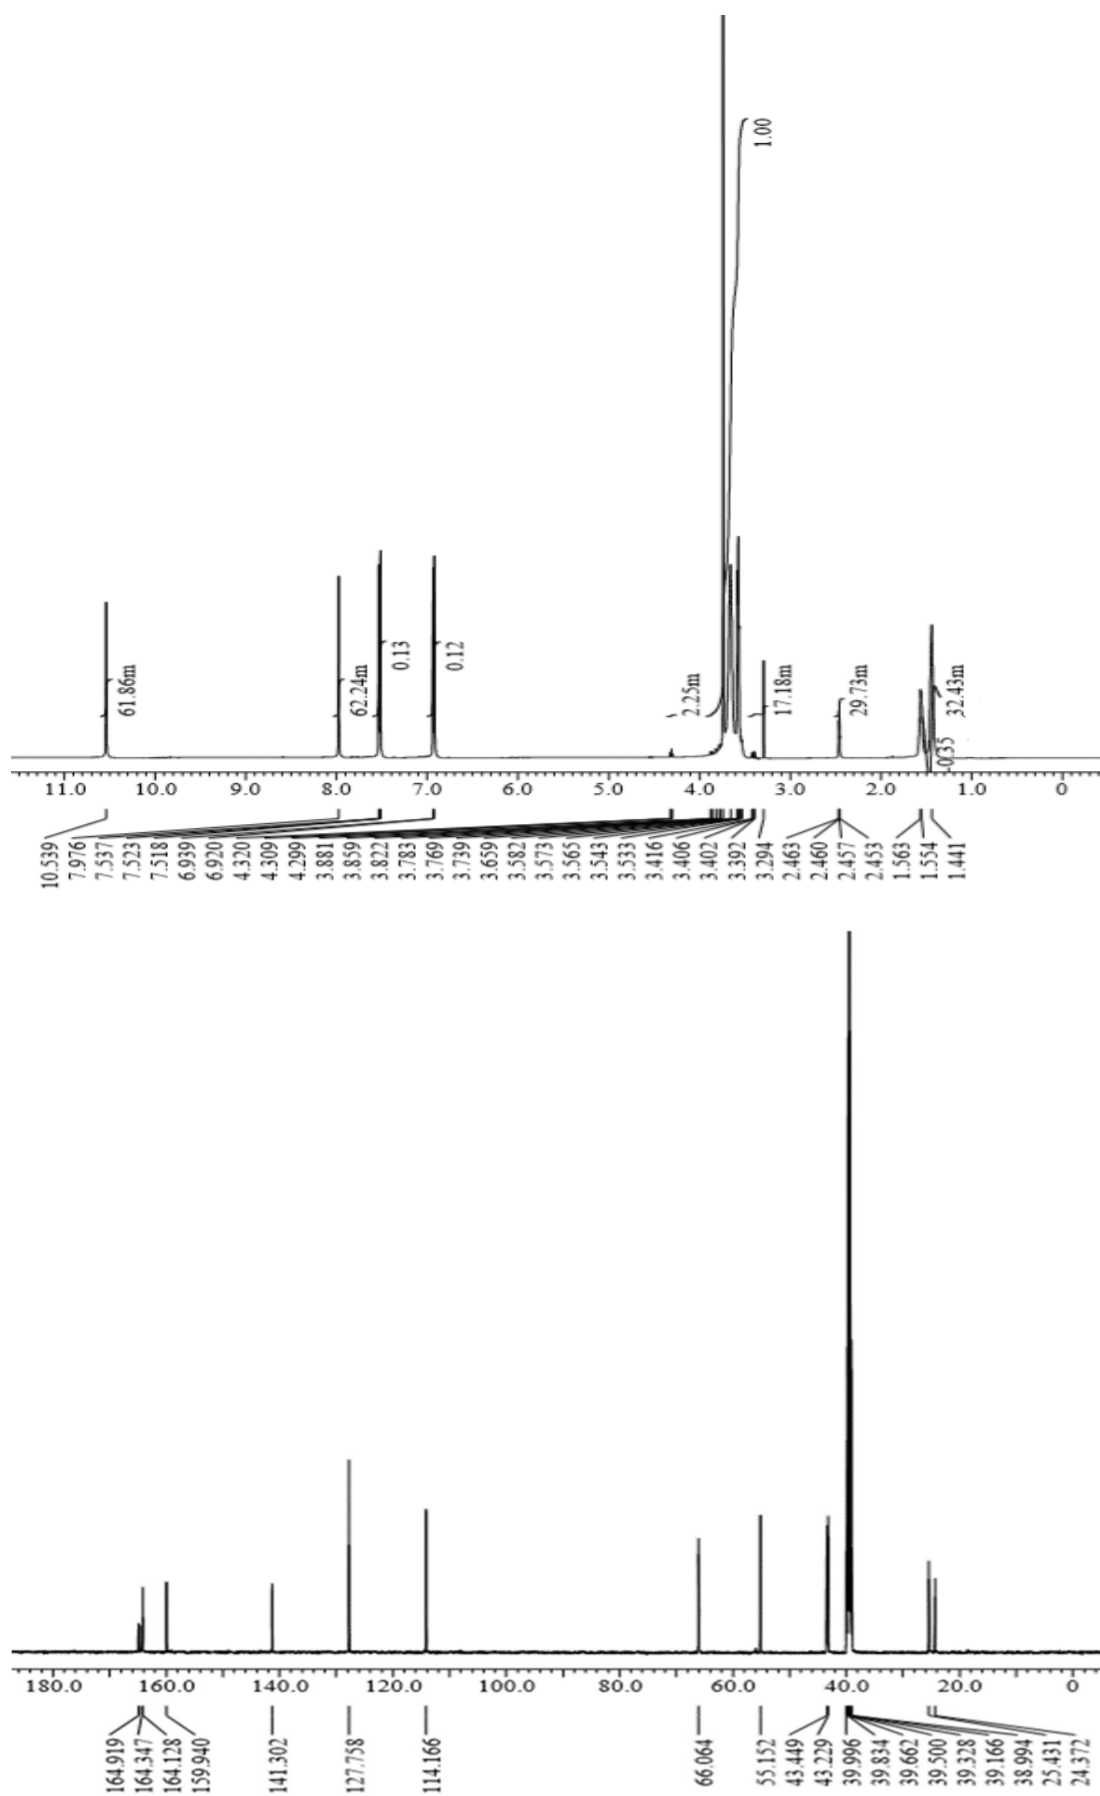

Figure S17.  $^1\text{H-NMR}$  and  $^{13}\text{C-NMR}$  for compound 9f.

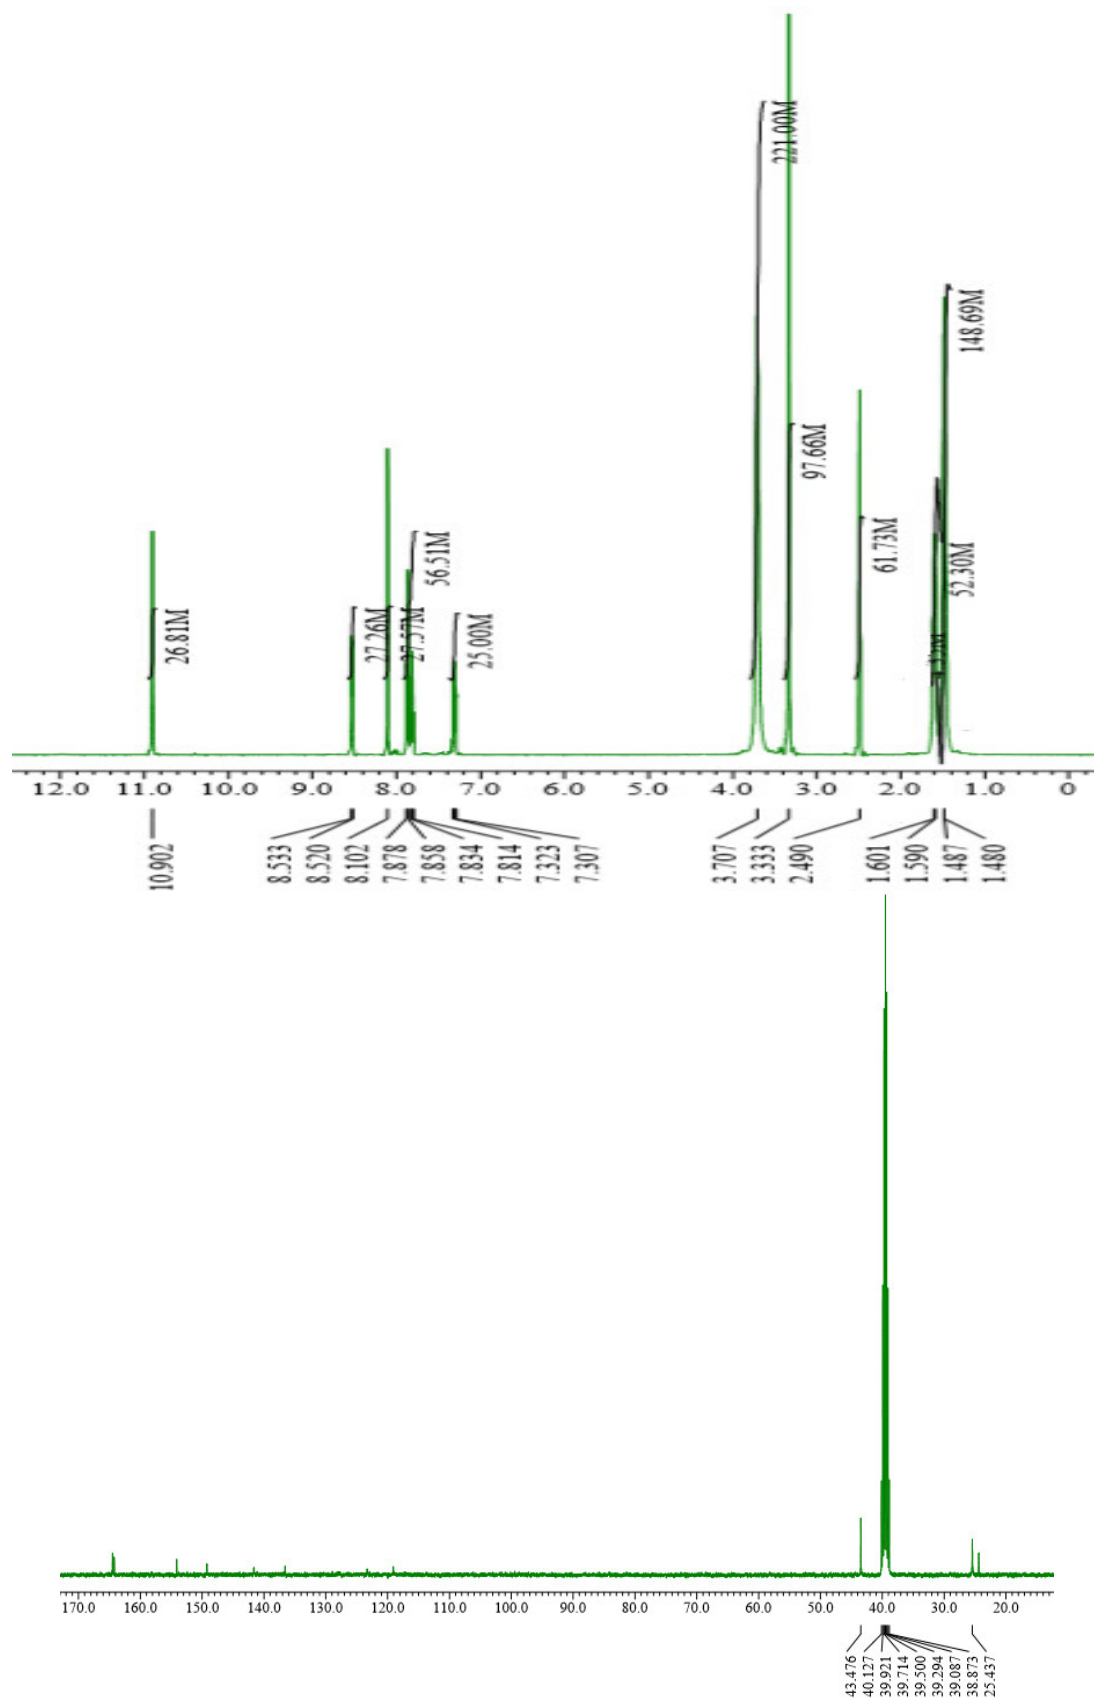

Figure S18.  $^1\text{H-NMR}$  and  $^{13}\text{C-NMR}$  for compound 10.

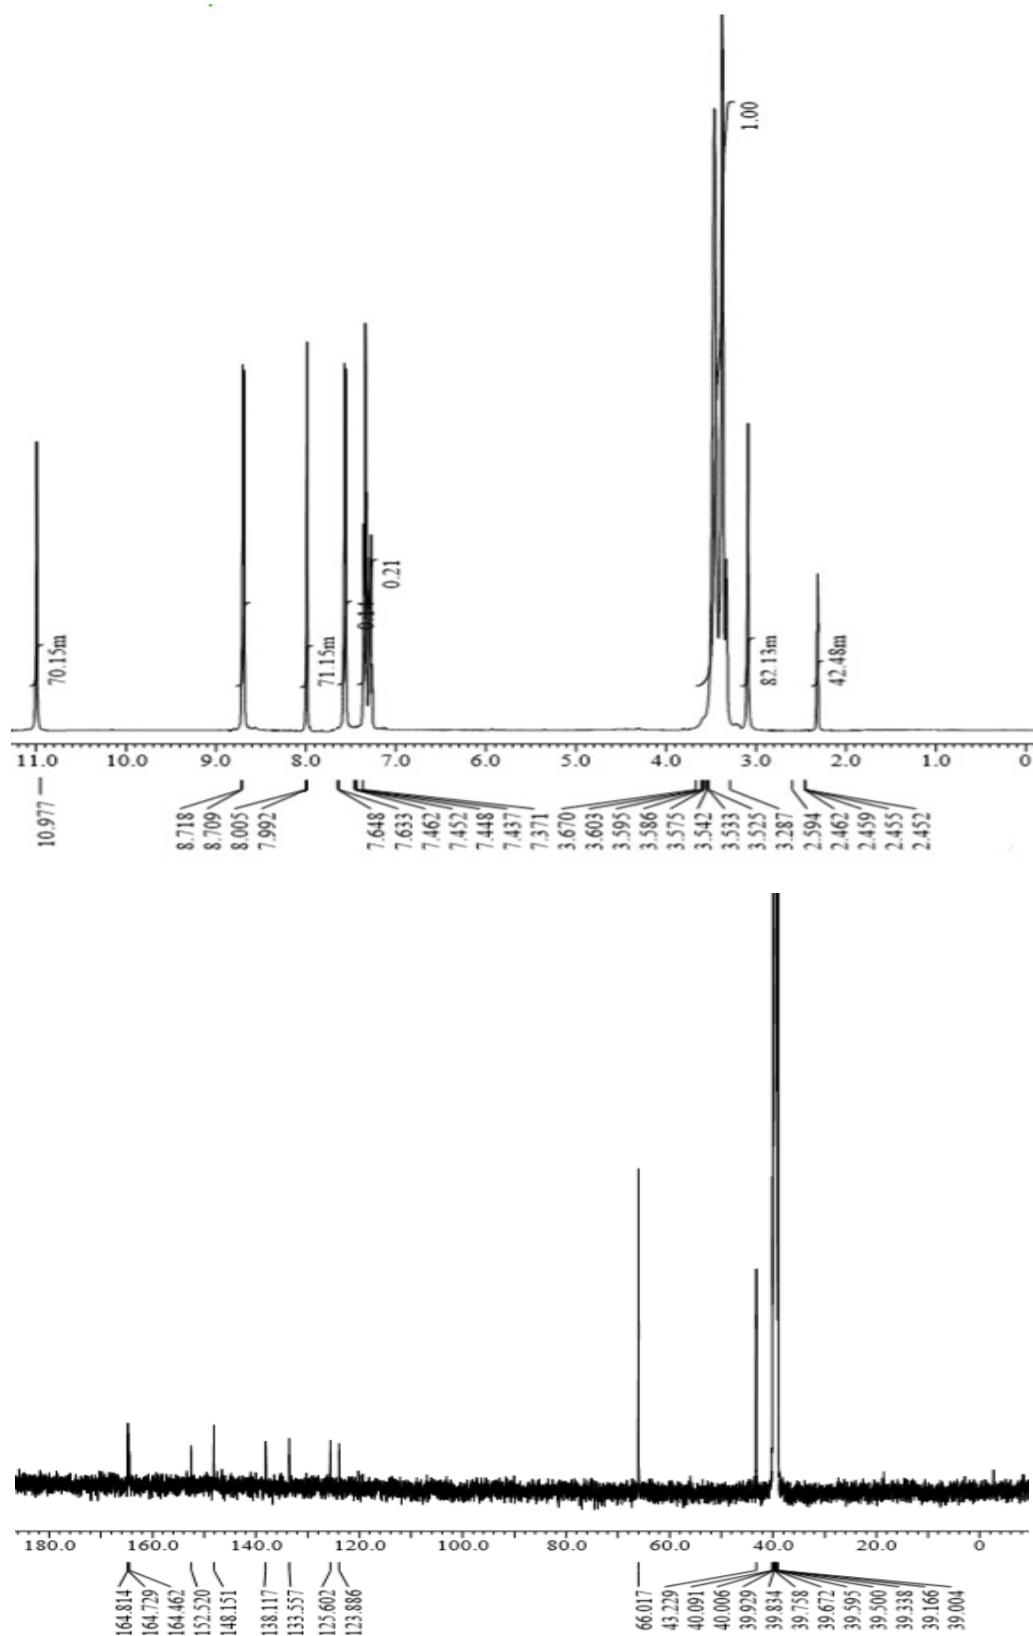Figure S19.  $^1\text{H-NMR}$  and  $^{13}\text{C-NMR}$  for compound 11.

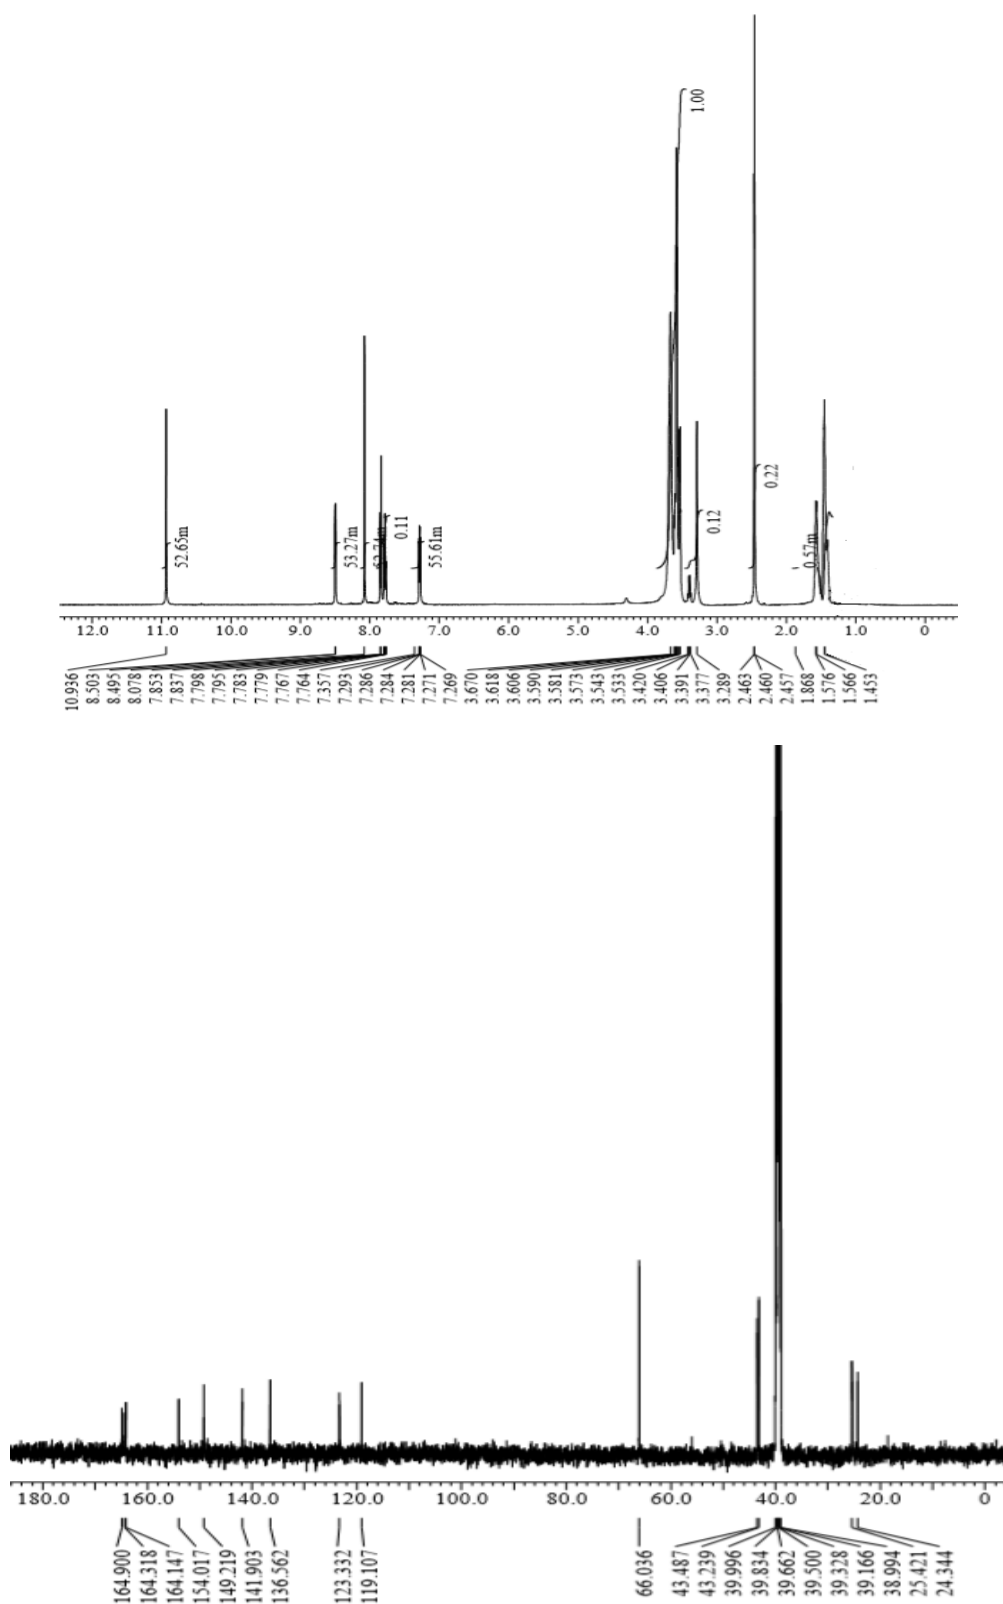Figure S20.  $^1\text{H-NMR}$  and  $^{13}\text{C-NMR}$  for compound 12.
